# Supplementary material for: Genetic polymorphisms in pri-let-7a-2 are associated with ischemic stroke risk in a Chinese Han population from Liaoning, China: a case-control study
Source: PubMed Central journal article supplement — Neural Regen Res. 2020 Dec 12;16(7):1302–7. doi: 10.4103/1673-5374.301019 (PMC8284288; doi:10.4103/1673-5374.301019), 2020-12-12
Supplement: NRR-16-1302_Suppl1.pdf [file NRR-16-1302_Suppl1.pdf]

回顾性分析信息采集表

| 一、基本信息                     |                                                                                                                                                            |                                                                                                                                                                                                                                                                                                                                                             |      |
|----------------------------|------------------------------------------------------------------------------------------------------------------------------------------------------------|-------------------------------------------------------------------------------------------------------------------------------------------------------------------------------------------------------------------------------------------------------------------------------------------------------------------------------------------------------------|------|
| 信息采集时间                     | 调查员姓名                                                                                                                                                      | 组别                                                                                                                                                                                                                                                                                                                                                          | 编号   |
| 姓名                         | 性别                                                                                                                                                         | 年龄 (岁)                                                                                                                                                                                                                                                                                                                                                      | 民族   |
| 身高 (m)                     | 体重 (kg)                                                                                                                                                    | BMI (kg/m <sup>2</sup> ):                                                                                                                                                                                                                                                                                                                                   |      |
| 籍贯                         | 家庭住址                                                                                                                                                       | 省 市 区                                                                                                                                                                                                                                                                                                                                                       | 街道 号 |
| 文化程度                       | 工作单位                                                                                                                                                       | 父亲籍贯                                                                                                                                                                                                                                                                                                                                                        | 母亲籍贯 |
| 是否已退休                      | 联系电话                                                                                                                                                       | 父亲民族                                                                                                                                                                                                                                                                                                                                                        | 母亲民族 |
| 二、生活方式                     |                                                                                                                                                            |                                                                                                                                                                                                                                                                                                                                                             |      |
| 吸烟史                        | <input type="checkbox"/> 现在吸烟<br><input type="checkbox"/> 已戒烟                                                                                              | 您从____岁开始每天吸烟<br>您每天吸____支机制卷烟<br>如果您吸旱烟, 每年消耗____斤烟草<br>您以前是否每天吸烟 <input type="checkbox"/> 是 <input type="checkbox"/> 否<br>您从____周岁开始吸烟<br>您已经戒烟 年 月 周 日                                                                                                                                                                                                   |      |
| 饮酒史                        | <input type="checkbox"/> 从不吸烟<br><input type="checkbox"/> 不饮酒<br><input type="checkbox"/> 少量饮酒<br><input type="checkbox"/> 经常大量饮酒                          | 白酒≥3次/周, 每次≥2两                                                                                                                                                                                                                                                                                                                                              |      |
| 三、家族史                      |                                                                                                                                                            |                                                                                                                                                                                                                                                                                                                                                             |      |
| 3.1脑卒中 (中风/脑血栓/脑梗死/脑出血)    | <input type="checkbox"/> 无 <input type="checkbox"/> 有, 与本人关系: <input type="checkbox"/> 父亲 <input type="checkbox"/> 母亲 <input type="checkbox"/> 兄弟姐妹 (患病 人) | <input type="checkbox"/> 不详                                                                                                                                                                                                                                                                                                                                 |      |
| 3.2冠心病 (急性心肌梗死/心绞痛/缺血性心肌病) | <input type="checkbox"/> 无 <input type="checkbox"/> 有, 与本人关系: <input type="checkbox"/> 父亲 <input type="checkbox"/> 母亲 <input type="checkbox"/> 兄弟姐妹 (患病 人) | <input type="checkbox"/> 不详                                                                                                                                                                                                                                                                                                                                 |      |
| 3.3高血压                     | <input type="checkbox"/> 无 <input type="checkbox"/> 有, 与本人关系: <input type="checkbox"/> 父亲 <input type="checkbox"/> 母亲 <input type="checkbox"/> 兄弟姐妹 (患病 人) | <input type="checkbox"/> 不详                                                                                                                                                                                                                                                                                                                                 |      |
| 3.4糖尿病                     | <input type="checkbox"/> 无 <input type="checkbox"/> 有, 与本人关系: <input type="checkbox"/> 父亲 <input type="checkbox"/> 母亲 <input type="checkbox"/> 兄弟姐妹 (患病 人) | <input type="checkbox"/> 不详                                                                                                                                                                                                                                                                                                                                 |      |
| 四、本次信息采集期间主要病史及辅助检查        |                                                                                                                                                            |                                                                                                                                                                                                                                                                                                                                                             |      |
| 4.1有无新发缺血性脑血管病             | <input type="checkbox"/> 无 <input type="checkbox"/> 有: 发病时间 年 月 日                                                                                          | 如果有<br>主要诊断 <input type="checkbox"/> 脑梗死 <input type="checkbox"/> 短暂性脑缺血发作 (TIA)<br>诊断依据 <input type="checkbox"/> 脑CT <input type="checkbox"/> 脑部MRI <input type="checkbox"/> 临床表现 (症状、体征)<br>脑血管检查 脑血管彩超:<br>双侧颈动脉超声:<br>CTA:<br>MRA:<br>TOAST分型 <input type="checkbox"/> 大动脉粥样硬化性脑梗死<br><input type="checkbox"/> 小动脉闭塞性脑梗死<br><input type="checkbox"/> 其他 |      |
| 4.2有无高血压                   | <input type="checkbox"/> 无 <input type="checkbox"/> 有                                                                                                      | 收缩压mmHg<br>舒张压mmHg                                                                                                                                                                                                                                                                                                                                          |      |
| 4.3有无糖尿病                   | <input type="checkbox"/> 无 <input type="checkbox"/> 有                                                                                                      | 用药情况<br>空腹血糖 mmol/l<br>餐后2h血糖 mmol/l<br>随机血糖 mmol/l<br>口服降糖药情况<br>胰岛素使用情况                                                                                                                                                                                                                                                                                   |      |
| 4.4是否有血脂异常                 | <input type="checkbox"/> 无 <input type="checkbox"/> 有                                                                                                      | 血脂异常类型: <input type="checkbox"/> 高胆固醇 <input type="checkbox"/> 高甘油三酯 <input type="checkbox"/> 高LDL-C <input type="checkbox"/> 低HDL-C<br>化验结果: (mmol/l)<br>总胆固醇<br>甘油三脂<br>HDL-C<br>LDL-C                                                                                                                                                                    |      |
| 4.5是否有心脏疾病                 | <input type="checkbox"/> 无 <input type="checkbox"/> 有                                                                                                      | 心脏病类型: <input type="checkbox"/> 冠心病 <input type="checkbox"/> 房颤 <input type="checkbox"/> 瓣膜病 <input type="checkbox"/> 其他<br>用药情况                                                                                                                                                                                                                            |      |
| 4.6是否有恶性肿瘤                 | <input type="checkbox"/> 无 <input type="checkbox"/> 有                                                                                                      | 肿瘤部位:                                                                                                                                                                                                                                                                                                                                                       |      |
| 4.7是否存在严重肝肾功能损害            | <input type="checkbox"/> 无 <input type="checkbox"/> 有                                                                                                      | 具体诊断:                                                                                                                                                                                                                                                                                                                                                       |      |
| 4.8是否存在血液系统疾病              | <input type="checkbox"/> 无 <input type="checkbox"/> 有                                                                                                      | 具体诊断:                                                                                                                                                                                                                                                                                                                                                       |      |
| 4.8是否存在自身免疫性疾病             | <input type="checkbox"/> 无 <input type="checkbox"/> 有                                                                                                      | 具体诊断:                                                                                                                                                                                                                                                                                                                                                       |      |
| 4.9是否存在慢性炎症                | <input type="checkbox"/> 无 <input type="checkbox"/> 有                                                                                                      | 具体诊断:                                                                                                                                                                                                                                                                                                                                                       |      |
