# Supplementary material for: Genetic polymorphisms in pri-let-7a-2 are associated with ischemic stroke risk in a Chinese Han population from Liaoning, China: a case-control study
Source: PubMed Central journal article supplement — Neural Regen Res. 2020 Dec 12;16(7):1302–7. doi: 10.4103/1673-5374.301019 (PMC8284288; doi:10.4103/1673-5374.301019), 2020-12-12

# 中国医科大学附属第一医院医学科学研究伦理委员会 批准函

科伦审[2012]38号

|                                                                                            |                                             |       |           |      |      |
|--------------------------------------------------------------------------------------------|---------------------------------------------|-------|-----------|------|------|
| 项目名称                                                                                       | 脑出血患者外周血及出血灶周围脑组织特异性 microRNA 表达谱及其脑水肿机制的研究 |       |           |      |      |
| 项目来源                                                                                       | 国家自然科学基金委                                   |       |           |      |      |
| CRO                                                                                        | ——                                          |       |           |      |      |
| 承担科室                                                                                       | 神经内科                                        | 项目负责人 | 何志义       | 申请状态 | 项目申报 |
| 审查文件（含版本号）如下：<br><br><input type="checkbox"/> 申请书<br><input type="checkbox"/> 知情同意书 版本：1.0 |                                             |       |           |      |      |
| 出席会议人数：8 人                                                                                 |                                             |       | 弃权或回避：1 人 |      |      |
| 同意                                                                                         | 修正后同意                                       | 修正后重审 | 不同意       |      |      |
| 0 票                                                                                        | 0 票                                         | 7 票   | 0 票       |      |      |

1. 伦理委员会对项目的审查决定如下（在□内划×）

同意     
  修正后同意     
  修正后重审     
  不同意

2. 经伦理委员会的审查，具体的意见和建议：

① 补充“健康人群知情同意书”。

② 研究方案中补充“对照组人群的入选标准、排除标准”。

③ 研究方案中“每个受试者采集 2-3ml 静脉血”与知情同意书中“常规检查后的剩余血清”相矛盾。

3. 按照伦理委员会的建议和意见修改后，提交伦理委员会进行会议审查。

主任(副主任)委员签名:

伦理委员会公章:

日期: 2012.2.20

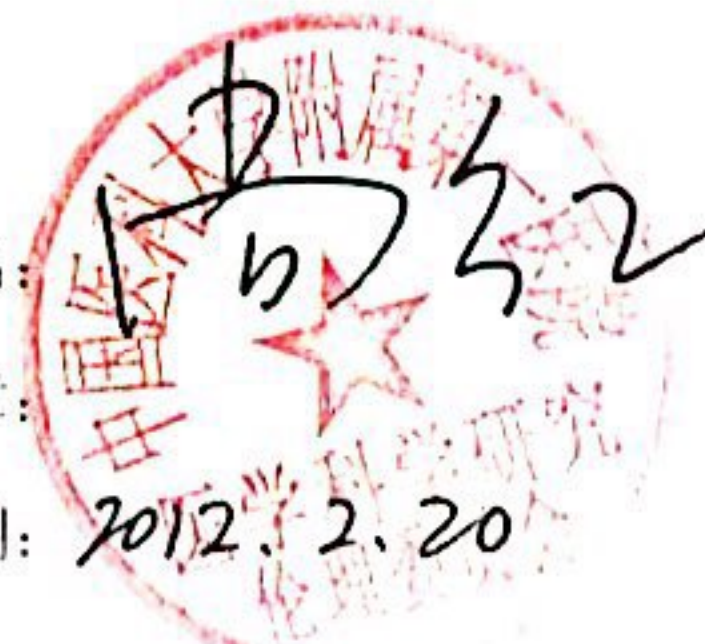

Supplement: NRR-16-1302_Suppl2.pdf [file NRR-16-1302_Suppl2.pdf]
