# Supplementary material for: Genetic polymorphisms in pri-let-7a-2 are associated with ischemic stroke risk in a Chinese Han population from Liaoning, China: a case-control study
Source: PubMed Central journal article supplement — Neural Regen Res. 2020 Dec 12;16(7):1302–7. doi: 10.4103/1673-5374.301019 (PMC8284288; doi:10.4103/1673-5374.301019), 2020-12-12
Supplement: NRR-16-1302_Suppl4.pdf [file NRR-16-1302_Suppl4.pdf]

| SampleName | IS | NHSS评分 | mRS评分 | aspirin | statin | thrombotic | rs1143770 | rs629367 | 性别 | 年龄 | BMI | 糖尿病史 | 高血压史 | 吸烟史 | 饮酒史 | TG甘油三酯 | TG胆固醇 | HDL | LDL | 血糖 | 脑卒中家族史 | rs1143770D | rs1143770R | rs629367D | rs629367R |      |      |
|------------|----|--------|-------|---------|--------|------------|-----------|----------|----|----|-----|------|------|-----|-----|--------|-------|-----|-----|----|--------|------------|------------|-----------|-----------|------|------|
| 1          | 1  | 12.00  | 2.00  | 2.00    | 2.00   | 2.00       | 1         | 1        | 1  | 2  | 1   | 1    | 1    | 1   | 1   | 2      | 1     | 1   | 2   | 2  | 1      | 2          | 4.00       | 1.00      | 4.00      | 1.00 |      |
| 10         | 1  | 5.00   | 3.00  | 2.00    | 2.00   | 2.00       | 1         | 1        | 2  | 2  | 2   | 1    | 2    | 1   | 1   | 1      | 1     | 1   | 2   | 1  | 1      | 2          | 4.00       | 1.00      | 4.00      | 1.00 |      |
| 100        | 1  | 12.00  | 3.00  | 2.00    | 2.00   | 2.00       | 1         | 2        | 1  | 2  | 2   | 1    | 1    | 2   | 1   | 2      | 1     | 1   | 2   | 2  | 2      | 2          | 4.00       | 1.00      | 4.00      | 2.00 |      |
| 101        | 1  | 4.00   | 3.00  | 2.00    | 2.00   | 2.00       | 2         | 3        | 2  | 2  | 1   | 2    | 1    | 2   | 2   | 1      | 2     | 2   | 2   | 2  | 2      | 2          | 4.00       | 2.00      | 3.00      | 2.00 |      |
| 102        | 1  | 4.00   | 3.00  | 2.00    | 2.00   | 2.00       | 2         | 3        | 2  | 1  | 2   | 1    | 2    | 1   | 2   | 2      | 1     | 1   | 2   | 2  | 2      | 1          | 2          | 4.00      | 2.00      | 3.00 | 2.00 |
| 103        | 1  | 4.00   | 3.00  | 2.00    | 2.00   | 2.00       | 2         | 2        | 2  | 1  | 1   | 1    | 1    | 2   | 2   | 2      | 1     | 2   | 2   | 2  | 1      | 2          | 4.00       | 2.00      | 4.00      | 2.00 |      |
| 104        | 1  | 12.00  | 4.00  | 2.00    | 2.00   | 1.00       | 2         | 2        | 1  | 1  | 2   | 2    | 1    | 1   | 2   | 2      | 2     | 2   | 2   | 2  | 2      | 2          | 4.00       | 2.00      | 4.00      | 2.00 |      |
| 105        | 1  | 12.00  | 4.00  | 2.00    | 2.00   | 2.00       | 2         | 3        | 1  | 1  | 1   | 1    | 2    | 1   | 1   | 2      | 2     | 2   | 2   | 1  | 2      | 2          | 4.00       | 2.00      | 3.00      | 2.00 |      |
| 106        | 1  | 12.00  | 4.00  | 2.00    | 2.00   | 1.00       | 2         | 3        | 1  | 2  | 2   | 1    | 1    | 1   | 1   | 1      | 1     | 1   | 2   | 2  | 1      | 2          | 4.00       | 2.00      | 3.00      | 2.00 |      |
| 107        | 1  | 5.00   | 3.00  | 1.00    | 2.00   | 2.00       | 2         | 3        | 1  | 1  | 1   | 1    | 2    | 2   | 2   | 2      | 2     | 2   | 2   | 2  | 1      | 2          | 4.00       | 2.00      | 3.00      | 2.00 |      |
| 108        | 1  | 5.00   | 3.00  | 1.00    | 2.00   | 2.00       | 2         | 3        | 1  | 1  | 2   | 2    | 2    | 2   | 2   | 2      | 2     | 2   | 2   | 2  | 2      | 2          | 4.00       | 2.00      | 3.00      | 2.00 |      |
| 109        | 1  | 12.00  | 4.00  | 2.00    | 2.00   | 1.00       | 2         | 3        | 1  | 1  | 1   | 1    | 2    | 1   | 1   | 2      | 2     | 2   | 2   | 2  | 2      | 2          | 4.00       | 2.00      | 3.00      | 2.00 |      |
| 11         | 1  | 5.00   | 3.00  | 2.00    | 2.00   | 1.00       | 1         | 1        | 1  | 2  | 2   | 1    | 2    | 1   | 1   | 1      | 1     | 1   | 2   | 2  | 1      | 2          | 4.00       | 1.00      | 4.00      | 1.00 |      |
| 110        | 1  | 4.00   | 3.00  | 2.00    | 2.00   | 2.00       | 2         | 3        | 2  | 1  | 1   | 1    | 2    | 1   | 2   | 2      | 1     | 2   | 1   | 2  | 1      | 2          | 4.00       | 2.00      | 3.00      | 2.00 |      |
| 111        | 1  | 4.00   | 1.00  | 2.00    | 2.00   | 2.00       | 2         | 3        | 2  | 1  | 1   | 1    | 2    | 1   | 2   | 2      | 1     | 2   | 2   | 2  | 2      | 2          | 4.00       | 2.00      | 3.00      | 2.00 |      |
| 112        | 1  | 12.00  | 4.00  | 2.00    | 2.00   | 1.00       | 2         | 3        | 1  | 2  | 2   | 1    | 1    | 1   | 1   | 2      | 1     | 2   | 1   | 2  | 1      | 2          | 4.00       | 2.00      | 3.00      | 2.00 |      |
| 113        | 1  | 12.00  | 4.00  | 2.00    | 2.00   | 1.00       | 2         | 3        | 1  | 2  | 2   | 1    | 2    | 1   | 1   | 1      | 1     | 2   | 2   | 2  | 1      | 2          | 4.00       | 2.00      | 3.00      | 2.00 |      |
| 114        | 1  | 12.00  | 4.00  | 2.00    | 2.00   | 1.00       | 2         | 3        | 1  | 2  | 1   | 2    | 1    | 2   | 1   | 2      | 2     | 2   | 2   | 2  | 2      | 2          | 4.00       | 2.00      | 3.00      | 2.00 |      |
| 115        | 1  | 5.00   | 3.00  | 2.00    | 2.00   | 2.00       | 2         | 3        | 2  | 2  | 1   | 2    | 1    | 2   | 2   | 2      | 1     | 2   | 2   | 2  | 1      | 2          | 4.00       | 2.00      | 3.00      | 2.00 |      |
| 116        | 1  | 12.00  | 3.00  | 2.00    | 2.00   | 2.00       | 2         | 3        | 1  | 1  | 1   | 1    | 2    | 1   | 2   | 2      | 2     | 2   | 2   | 2  | 2      | 2          | 4.00       | 2.00      | 3.00      | 2.00 |      |
| 117        | 1  | 12.00  | 3.00  | 1.00    | 2.00   | 1.00       | 2         | 2        | 2  | 1  | 1   | 1    | 1    | 2   | 2   | 2      | 1     | 2   | 2   | 2  | 1      | 2          | 4.00       | 2.00      | 4.00      | 2.00 |      |
| 118        | 1  | 5.00   | 3.00  | 2.00    | 2.00   | 2.00       | 2         | 2        | 1  | 1  | 2   | 1    | 2    | 1   | 1   | 1      | 1     | 1   | 2   | 2  | 1      | 1          | 4.00       | 2.00      | 4.00      | 2.00 |      |
| 118        | 1  | 5.00   | 3.00  | 2.00    | 2.00   | 2.00       | 3         | 3        | 2  | 1  | 2   | 1    | 2    | 1   | 1   | 1      | 1     | 1   | 2   | 2  | 1      | 1          | 3.00       | 2.00      | 3.00      | 2.00 |      |
| 119        | 1  | 5.00   | 3.00  | 2.00    | 2.00   | 1.00       | 3         | 3        | 2  | 1  | 1   | 1    | 2    | 1   | 2   | 2      | 1     | 2   | 2   | 2  | 2      | 2          | 3.00       | 2.00      | 3.00      | 2.00 |      |
| 12         | 1  | 5.00   | 3.00  | 2.00    | 2.00   | 2.00       | 1         | 1        | 2  | 2  | 1   | 2    | 1    | 2   | 2   | 2      | 2     | 2   | 2   | 2  | 2      | 2          | 4.00       | 1.00      | 4.00      | 1.00 |      |
| 120        | 1  | 5.00   | 3.00  | 2.00    | 2.00   | 1.00       | 3         | 3        | 2  | 1  | 2   | 1    | 2    | 1   | 2   | 2      | 1     | 2   | 2   | 2  | 1      | 2          | 3.00       | 2.00      | 3.00      | 2.00 |      |
| 121        | 1  | 5.00   | 3.00  | 2.00    | 2.00   | 2.00       | 2         | 3        | 1  | 2  | 2   | 1    | 2    | 1   | 2   | 2      | 1     | 2   | 1   | 2  | 1      | 2          | 4.00       | 2.00      | 3.00      | 2.00 |      |
| 122        | 1  | 5.00   | 3.00  | 2.00    | 2.00   | 2.00       | 2         | 3        | 1  | 1  | 1   | 1    | 2    | 2   | 2   | 1      | 2     | 2   | 2   | 2  | 2      | 2          | 4.00       | 2.00      | 3.00      | 2.00 |      |
| 123        | 1  | 5.00   | 2.00  | 2.00    | 2.00   | 2.00       | 3         | 3        | 1  | 2  | 1   | 2    | 2    | 2   | 2   | 2      | 2     | 2   | 2   | 1  | 2      | 2          | 3.00       | 2.00      | 3.00      | 2.00 |      |
| 124        | 1  | 5.00   | 3.00  | 2.00    | 2.00   | 2.00       | 3         | 3        | 1  | 2  | 2   | 2    | 2    | 2   | 2   | 1      | 2     | 1   | 2   | 2  | 2      | 2          | 3.00       | 2.00      | 3.00      | 2.00 |      |
| 125        | 1  | 12.00  | 3.00  | 2.00    | 2.00   | 2.00       | 2         | 2        | 1  | 1  | 2   | 1    | 2    | 1   | 2   | 1      | 2     | 2   | 2   | 2  | 1      | 2          | 4.00       | 2.00      | 4.00      | 2.00 |      |
| 126        | 1  | 5.00   | 3.00  | 2.00    | 2.00   | 2.00       | 2         | 2        | 2  | 2  | 1   | 2    | 2    | 2   | 2   | 2      | 1     | 2   | 2   | 2  | 2      | 2          | 4.00       | 2.00      | 4.00      | 2.00 |      |
| 127        | 1  | 12.00  | 3.00  | 2.00    | 2.00   | 2.00       | 1         | 3        | 1  | 1  | 1   | 1    | 2    | 1   | 2   | 2      | 2     | 2   | 2   | 1  | 2      | 2          | 4.00       | 1.00      | 4.00      | 2.00 |      |
| 128        | 1  | 12.00  | 3.00  | 2.00    | 2.00   | 2.00       | 1         | 3        | 2  | 1  | 2   | 1    | 1    | 1   | 2   | 2      | 1     | 1   | 2   | 2  | 1      | 2          | 4.00       | 1.00      | 3.00      | 2.00 |      |
| 129        | 1  | 5.00   | 3.00  | 2.00    | 2.00   | 2.00       | 2         | 3        | 1  | 1  | 2   | 2    | 2    | 2   | 2   | 1      | 1     | 1   | 2   | 2  | 2      | 2          | 4.00       | 2.00      | 3.00      | 2.00 |      |
| 13         | 1  | 5.00   | 3.00  | 2.00    | 2.00   | 1.00       | 3         | 2        | 2  | 1  | 1   | 1    | 1    | 1   | 2   | 2      | 1     | 1   | 2   | 2  | 1      | 2          | 3.00       | 2.00      | 4.00      | 2.00 |      |
| 130        | 1  | 4.00   | 1.00  | 2.00    | 2.00   | 2.00       | 2         | 3        | 2  | 1  | 2   | 1    | 2    | 1   | 2   | 2      | 1     | 2   | 1   | 2  | 1      | 2          | 4.00       | 2.00      | 3.00      | 2.00 |      |
| 131        | 1  | 5.00   | 3.00  | 2.00    | 2.00   | 2.00       | 2         | 2        | 1  | 2  | 1   | 2    | 2    | 1   | 1   | 2      | 1     | 2   | 2   | 2  | 1      | 2          | 4.00       | 2.00      | 4.00      | 2.00 |      |
| 132        | 1  | 4.00   | 1.00  | 2.00    | 2.00   | 2.00       | 2         | 2        | 2  | 1  | 2   | 2    | 2    | 1   | 2   | 2      | 2     | 2   | 2   | 2  | 2      | 2          | 4.00       | 2.00      | 4.00      | 2.00 |      |
| 133        | 1  | 12.00  | 3.00  | 2.00    | 2.00   | 2.00       | 1         | 2        | 2  | 2  | 2   | 2    | 2    | 1   | 2   | 2      | 1     | 1   | 2   | 2  | 2      | 2          | 4.00       | 1.00      | 4.00      | 2.00 |      |
| 134        | 1  | 12.00  | 3.00  | 2.00    | 2.00   | 2.00       | 1         | 2        | 1  | 1  | 1   | 2    | 1    | 2   | 2   | 2      | 2     | 2   | 2   | 2  | 2      | 2          | 4.00       | 1.00      | 4.00      | 2.00 |      |
| 135        | 1  | 4.00   | 3.00  | 2.00    | 2.00   | 2.00       | 3         | 3        | 2  | 1  | 2   | 2    | 1    | 2   | 2   | 1      | 2     | 1   | 2   | 1  | 2      | 2          | 3.00       | 2.00      | 3.00      | 2.00 |      |
| 136        | 1  | 5.00   | 2.00  | 2.00    | 2.00   | 2.00       | 3         | 3        | 1  | 1  | 1   | 1    | 2    | 2   | 2   | 2      | 2     | 2   | 2   | 2  | 2      | 1          | 3.00       | 2.00      | 3.00      | 2.00 |      |
| 136        | 1  | 1.00   | 0.00  | 2.00    | 2.00   | 2.00       | 3         | 3        | 2  | 1  | 1   | 1    | 2    | 2   | 2   | 2      | 2     | 2   | 2   | 2  | 2      | 1          | 3.00       | 2.00      | 3.00      | 2.00 |      |
| 137        | 1  | 12.00  | 3.00  | 2.00    | 2.00   | 1.00       | 2         | 2        | 2  | 1  | 2   | 2    | 2    | 1   | 2   | 2      | 1     | 2   | 2   | 2  | 2      | 2          | 4.00       | 2.00      | 4.00      | 2.00 |      |
| 138        | 1  | 5.00   | 3.00  | 2.00    | 2.00   | 2.00       | 2         | 2        | 1  | 1  | 2   | 1    | 2    | 1   | 2   | 1      | 2     | 2   | 2   | 2  | 1      | 2          | 4.00       | 2.00      | 4.00      | 2.00 |      |
| 139        | 1  | 5.00   | 3.00  | 1.00    | 2.00   | 2.00       | 2         | 2        | 1  | 1  | 2   | 2    | 2    | 2   | 2   | 2      | 2     | 2   | 2   | 2  | 2      | 2          | 4.00       | 2.00      | 4.00      | 2.00 |      |
| 14         | 1  | 1.00   | 0.00  | 2.00    | 2.00   | 2.00       | 3         | 2        | 2  | 1  | 2   | 2    | 2    | 2   | 2   | 2      | 2     | 2   | 2   | 1  | 2      | 2          | 3.00       | 2.00      | 4.00      | 2.00 |      |
| 140        | 1  | 12.00  | 3.00  | 2.00    | 2.00   | 1.00       | 2         | 2        | 2  | 1  | 2   | 1    | 2    | 2   | 2   | 2      | 2     | 2   | 2   | 2  | 2      | 2          | 4.00       | 2.00      | 4.00      | 2.00 |      |
| 141        | 1  | 5.00   | 3.00  | 2.00    | 2.00   | 2.00       | 1         | 2        | 1  | 2  | 2   | 2    | 2    | 1   | 2   | 1      | 2     | 1   | 2   | 1  | 2      | 2          | 4.00       | 1.00      | 4.00      | 2.00 |      |
| 142        | 1  | 12.00  | 3.00  | 2.00    | 2.00   | 2.00       | 1         | 2        | 1  | 1  | 1   | 1    | 2    | 1   | 2   | 1      | 2     | 2   | 2   | 2  | 2      | 2          | 4.00       | 1.00      | 4.00      | 2.00 |      |
| 143        | 1  | 6.00   | 3.00  | 2.00    | 2.00   | 1.00       | 2         | 2        | 1  | 1  | 2   | 2    | 1    | 1   | 1   | 1      | 2     | 2   | 2   | 1  | 2      | 1          | 4.00       | 2.00      | 4.00      | 2.00 |      |
| 143        | 1  | 12.00  | 2.00  | 2.00    | 2.00   | 1.00       | 3         | 3        | 2  | 1  | 2   | 1    | 2    | 1   | 1   | 2      | 2     | 2   | 2   | 1  | 2      | 1          | 3.00       | 2.00      | 3.00      | 2.00 |      |
| 144        | 1  | 12.00  | 3.00  | 2.00    | 2.00   | 2.00       | 2         | 2        | 1  | 1  | 1   | 2    | 1    | 2   | 1   | 2      | 1     | 1   | 2   | 2  | 2      | 1          | 4.00       | 2.00      | 4.00      | 2.00 |      |
| 144        | 1  | 5.00   | 3.00  | 2.00    | 2.00   | 1.00       | 3         | 3        | 2  | 1  | 1   | 2    | 1    | 2   | 2   | 1      | 1     | 2   | 2   | 2  | 2      | 1          | 3.00       | 2.00      | 3.00      | 2.00 |      |
| 145        | 1  | 10.00  | 3.00  | 1.00    | 1.00   | 2.00       | 1         | 2        | 1  | 1  | 2   | 2    | 1    | 1   | 1   | 2      | 2     | 2   | 2   | 2  | 2      | 2          | 4.00       | 1.00      | 4.00      | 2.00 |      |
| 146        | 1  | 12.00  | 3.00  | 2.00    | 2.00   | 2.00       | 1         | 2        | 2  | 1  | 1   | 1    | 1    | 1   | 2   | 2      | 2     | 2   | 2   | 1  | 1      | 2          | 4.00       | 1.00      | 4.00      | 2.00 |      |
| 147        | 1  | 4.00   | 3.00  | 2.00    | 2.00   | 2.00       | 3         | 3        | 1  | 1  | 2   | 2    | 2    | 1   | 2   | 2      | 2     | 2   | 2   | 1  | 2      | 2          | 3.00       | 2.00      | 3.00      | 2.00 |      |
| 148        | 1  | 4.00   | 3.00  | 2.00    | 2.00   | 2.00       | 3         | 3        | 1  | 1  | 1   | 1    | 1    | 1   | 2   | 2      | 1     | 1   | 2   | 2  | 1      | 2          | 3.00       | 2.00      | 3.00      | 2.00 |      |
| 149        | 1  | 12.00  | 3.00  | 1.00    | 2.00   | 1.00       | 2         | 3        | 2  | 2  | 2   | 2    | 1    | 2   | 2   | 1      | 2     | 2   | 2   | 1  | 1      | 2          | 4.00       | 2.00      | 3.00      | 2.00 |      |
| 15         | 1  | 5.00   | 3.00  | 2.00    | 2.00   | 2.00       | 2         | 2        | 2  | 1  | 1   | 2    | 2    | 2   | 2   | 2      | 1     | 1   | 2   | 2  | 2      | 2          | 4.00       | 2.00      | 4.00      | 2.00 |      |
| 150        | 1  | 6.00   | 3.00  | 2.00    | 2.00   | 1.00       | 2         | 3        | 1  | 2  | 2   | 1    | 1    | 1</ |     |        |       |     |     |    |        |            |            |           |           |      |      |



|     |   |       |      |      |      |      |   |   |   |   |   |   |   |   |   |   |   |   |   |   |   |      |      |      |      |
|-----|---|-------|------|------|------|------|---|---|---|---|---|---|---|---|---|---|---|---|---|---|---|------|------|------|------|
| 269 | 1 | 12.00 | 4.00 | 2.00 | 2.00 | 2.00 | 3 | 3 | 1 | 2 | 2 | 2 | 1 | 1 | 1 | 2 | 2 | 2 | 2 | 2 | 2 | 3.00 | 2.00 | 3.00 | 2.00 |
| 27  | 1 | 2.00  | 0.00 | 2.00 | 2.00 | 2.00 | 2 | 2 | 2 | 1 | 1 | 2 | 1 | 2 | 2 | 1 | 2 | 2 | 2 | 2 | 2 | 4.00 | 2.00 | 4.00 | 2.00 |
| 270 | 1 | 4.00  | 3.00 | 2.00 | 2.00 | 2.00 | 3 | 3 | 1 | 1 | 2 | 2 | 1 | 2 | 2 | 2 | 2 | 2 | 2 | 1 | 2 | 3.00 | 2.00 | 3.00 | 2.00 |
| 271 | 1 | 12.00 | 3.00 | 2.00 | 2.00 | 2.00 | 1 | 2 | 2 | 1 | 1 | 2 | 1 | 2 | 2 | 1 | 2 | 2 | 2 | 2 | 2 | 4.00 | 1.00 | 4.00 | 2.00 |
| 272 | 1 | 5.00  | 3.00 | 2.00 | 2.00 | 2.00 | 1 | 2 | 1 | 1 | 1 | 2 | 1 | 2 | 2 | 1 | 2 | 2 | 2 | 1 | 2 | 4.00 | 1.00 | 4.00 | 2.00 |
| 273 | 1 | 5.00  | 3.00 | 2.00 | 2.00 | 2.00 | 1 | 2 | 2 | 2 | 1 | 1 | 2 | 2 | 2 | 2 | 2 | 2 | 2 | 1 | 2 | 4.00 | 1.00 | 4.00 | 2.00 |
| 274 | 1 | 5.00  | 3.00 | 2.00 | 2.00 | 2.00 | 1 | 2 | 2 | 1 | 1 | 2 | 2 | 2 | 2 | 2 | 2 | 2 | 1 | 2 | 2 | 4.00 | 1.00 | 4.00 | 2.00 |
| 275 | 1 | 8.00  | 3.00 | 1.00 | 1.00 | 2.00 | 1 | 3 | 2 | 2 | 2 | 1 | 1 | 1 | 1 | 1 | 2 | 2 | 2 | 2 | 2 | 4.00 | 1.00 | 3.00 | 2.00 |
| 276 | 1 | 5.00  | 3.00 | 2.00 | 2.00 | 1.00 | 1 | 3 | 1 | 2 | 2 | 1 | 2 | 1 | 1 | 2 | 2 | 2 | 2 | 1 | 2 | 4.00 | 1.00 | 3.00 | 2.00 |
| 277 | 1 | 5.00  | 3.00 | 2.00 | 2.00 | 2.00 | 2 | 3 | 2 | 1 | 2 | 2 | 2 | 2 | 2 | 2 | 2 | 2 | 2 | 1 | 2 | 4.00 | 2.00 | 3.00 | 2.00 |
| 278 | 1 | 16.00 | 3.00 | 2.00 | 2.00 | 2.00 | 1 | 3 | 1 | 1 | 1 | 2 | 1 | 1 | 1 | 2 | 2 | 2 | 2 | 2 | 2 | 4.00 | 1.00 | 3.00 | 2.00 |
| 278 | 1 | 16.00 | 3.00 | 2.00 | 2.00 | 1.00 | 1 | 3 | 2 | 1 | 1 | 2 | 1 | 1 | 1 | 2 | 2 | 2 | 2 | 2 | 2 | 4.00 | 1.00 | 3.00 | 2.00 |
| 278 | 1 | 6.00  | 3.00 | 2.00 | 2.00 | 1.00 | 2 | 3 | 1 | 1 | 1 | 2 | 1 | 1 | 1 | 2 | 2 | 2 | 2 | 2 | 2 | 4.00 | 2.00 | 3.00 | 2.00 |
| 279 | 1 | 1.00  | 0.00 | 2.00 | 2.00 | 2.00 | 3 | 3 | 2 | 1 | 1 | 2 | 2 | 2 | 2 | 2 | 2 | 2 | 2 | 2 | 2 | 3.00 | 2.00 | 3.00 | 2.00 |
| 28  | 1 | 5.00  | 3.00 | 2.00 | 2.00 | 2.00 | 2 | 2 | 1 | 2 | 1 | 2 | 2 | 1 | 2 | 2 | 2 | 2 | 2 | 2 | 2 | 4.00 | 2.00 | 4.00 | 2.00 |
| 280 | 1 | 5.00  | 3.00 | 2.00 | 2.00 | 2.00 | 2 | 3 | 1 | 2 | 2 | 2 | 2 | 2 | 2 | 2 | 2 | 2 | 2 | 2 | 2 | 4.00 | 2.00 | 3.00 | 2.00 |
| 280 | 1 | 5.00  | 2.00 | 2.00 | 2.00 | 2.00 | 2 | 3 | 2 | 1 | 2 | 2 | 2 | 2 | 2 | 2 | 2 | 2 | 2 | 2 | 2 | 4.00 | 2.00 | 3.00 | 2.00 |
| 280 | 1 | 5.00  | 2.00 | 2.00 | 2.00 | 2.00 | 3 | 3 | 1 | 2 | 1 | 2 | 2 | 2 | 2 | 2 | 2 | 2 | 2 | 2 | 2 | 3.00 | 2.00 | 3.00 | 2.00 |
| 281 | 1 | 5.00  | 3.00 | 1.00 | 1.00 | 2.00 | 2 | 3 | 1 | 2 | 1 | 2 | 2 | 2 | 2 | 2 | 2 | 2 | 2 | 2 | 2 | 4.00 | 2.00 | 3.00 | 2.00 |
| 281 | 1 | 5.00  | 3.00 | 2.00 | 2.00 | 2.00 | 2 | 3 | 1 | 2 | 1 | 2 | 2 | 2 | 2 | 2 | 2 | 2 | 2 | 2 | 2 | 4.00 | 2.00 | 3.00 | 2.00 |
| 281 | 1 | 5.00  | 2.00 | 2.00 | 2.00 | 2.00 | 2 | 3 | 2 | 2 | 1 | 2 | 2 | 2 | 2 | 2 | 2 | 2 | 2 | 2 | 2 | 4.00 | 2.00 | 3.00 | 2.00 |
| 282 | 1 | 5.00  | 3.00 | 1.00 | 1.00 | 2.00 | 2 | 3 | 1 | 1 | 1 | 1 | 2 | 2 | 2 | 2 | 2 | 2 | 2 | 2 | 1 | 4.00 | 2.00 | 3.00 | 2.00 |
| 282 | 1 | 5.00  | 3.00 | 2.00 | 2.00 | 2.00 | 2 | 3 | 1 | 1 | 1 | 1 | 2 | 2 | 2 | 2 | 2 | 2 | 2 | 2 | 2 | 4.00 | 2.00 | 3.00 | 2.00 |
| 282 | 1 | 5.00  | 2.00 | 2.00 | 2.00 | 2.00 | 2 | 3 | 2 | 1 | 1 | 1 | 2 | 2 | 2 | 2 | 2 | 2 | 2 | 1 | 2 | 4.00 | 2.00 | 3.00 | 2.00 |
| 283 | 1 | 5.00  | 3.00 | 2.00 | 2.00 | 2.00 | 2 | 2 | 2 | 1 | 1 | 2 | 2 | 2 | 2 | 2 | 2 | 2 | 1 | 2 | 2 | 4.00 | 2.00 | 4.00 | 2.00 |
| 284 | 1 | 5.00  | 3.00 | 2.00 | 2.00 | 2.00 | 2 | 2 | 1 | 1 | 1 | 2 | 2 | 2 | 2 | 2 | 2 | 2 | 2 | 2 | 1 | 4.00 | 2.00 | 4.00 | 2.00 |
| 285 | 1 | 10.00 | 3.00 | 1.00 | 1.00 | 2.00 | 1 | 2 | 1 | 1 | 1 | 2 | 1 | 1 | 1 | 2 | 2 | 2 | 2 | 1 | 2 | 4.00 | 1.00 | 4.00 | 2.00 |
| 286 | 1 | 10.00 | 3.00 | 1.00 | 1.00 | 2.00 | 1 | 2 | 1 | 1 | 2 | 2 | 1 | 1 | 1 | 2 | 2 | 2 | 2 | 2 | 2 | 4.00 | 1.00 | 4.00 | 2.00 |
| 287 | 1 | 5.00  | 3.00 | 2.00 | 2.00 | 2.00 | 2 | 2 | 2 | 1 | 2 | 2 | 1 | 2 | 2 | 2 | 2 | 2 | 2 | 2 | 1 | 4.00 | 2.00 | 4.00 | 2.00 |
| 288 | 1 | 5.00  | 3.00 | 2.00 | 2.00 | 2.00 | 2 | 2 | 1 | 1 | 2 | 2 | 2 | 2 | 2 | 2 | 2 | 2 | 2 | 2 | 2 | 4.00 | 2.00 | 4.00 | 2.00 |
| 289 | 1 | 5.00  | 2.00 | 2.00 | 2.00 | 2.00 | 3 | 3 | 1 | 2 | 2 | 2 | 2 | 2 | 2 | 2 | 2 | 2 | 2 | 2 | 2 | 3.00 | 2.00 | 3.00 | 2.00 |
| 29  | 1 | 12.00 | 3.00 | 2.00 | 2.00 | 2.00 | 3 | 1 | 1 | 1 | 1 | 1 | 1 | 2 | 2 | 2 | 2 | 2 | 2 | 1 | 2 | 3.00 | 2.00 | 4.00 | 1.00 |
| 290 | 1 | 12.00 | 3.00 | 2.00 | 2.00 | 2.00 | 3 | 3 | 1 | 2 | 2 | 1 | 1 | 1 | 2 | 2 | 2 | 2 | 2 | 2 | 2 | 3.00 | 2.00 | 3.00 | 2.00 |
| 291 | 1 | 12.00 | 4.00 | 2.00 | 2.00 | 1.00 | 2 | 3 | 1 | 2 | 2 | 2 | 2 | 1 | 1 | 2 | 2 | 2 | 2 | 2 | 2 | 4.00 | 2.00 | 3.00 | 2.00 |
| 291 | 1 | 12.00 | 1.00 | 2.00 | 2.00 | 1.00 | 2 | 3 | 2 | 2 | 2 | 2 | 2 | 1 | 2 | 2 | 2 | 2 | 2 | 2 | 2 | 4.00 | 2.00 | 3.00 | 2.00 |
| 291 | 1 | 12.00 | 1.00 | 2.00 | 2.00 | 1.00 | 3 | 3 | 1 | 2 | 2 | 2 | 2 | 1 | 1 | 2 | 2 | 2 | 2 | 2 | 2 | 3.00 | 2.00 | 3.00 | 2.00 |
| 292 | 1 | 5.00  | 3.00 | 2.00 | 2.00 | 2.00 | 2 | 3 | 1 | 2 | 2 | 1 | 2 | 2 | 2 | 2 | 2 | 2 | 2 | 2 | 2 | 4.00 | 2.00 | 3.00 | 2.00 |
| 292 | 1 | 5.00  | 2.00 | 2.00 | 2.00 | 2.00 | 2 | 3 | 2 | 2 | 1 | 2 | 2 | 2 | 2 | 2 | 2 | 2 | 2 | 2 | 2 | 4.00 | 2.00 | 3.00 | 2.00 |
| 292 | 1 | 5.00  | 2.00 | 2.00 | 2.00 | 2.00 | 3 | 3 | 1 | 2 | 1 | 2 | 2 | 2 | 2 | 2 | 2 | 2 | 2 | 2 | 2 | 3.00 | 2.00 | 3.00 | 2.00 |
| 293 | 1 | 5.00  | 3.00 | 2.00 | 2.00 | 2.00 | 2 | 3 | 1 | 2 | 1 | 2 | 2 | 2 | 2 | 2 | 2 | 2 | 2 | 2 | 2 | 4.00 | 2.00 | 3.00 | 2.00 |
| 294 | 1 | 12.00 | 4.00 | 2.00 | 2.00 | 2.00 | 2 | 3 | 1 | 1 | 1 | 1 | 1 | 2 | 1 | 2 | 2 | 2 | 1 | 2 | 2 | 4.00 | 2.00 | 3.00 | 2.00 |
| 295 | 1 | 12.00 | 3.00 | 2.00 | 2.00 | 1.00 | 2 | 3 | 2 | 1 | 2 | 2 | 1 | 2 | 2 | 1 | 2 | 2 | 2 | 2 | 2 | 4.00 | 2.00 | 3.00 | 2.00 |
| 296 | 1 | 12.00 | 3.00 | 2.00 | 2.00 | 1.00 | 2 | 3 | 2 | 1 | 1 | 1 | 1 | 2 | 2 | 2 | 2 | 2 | 2 | 1 | 2 | 4.00 | 2.00 | 3.00 | 2.00 |
| 297 | 1 | 12.00 | 3.00 | 2.00 | 2.00 | 2.00 | 1 | 2 | 2 | 1 | 2 | 2 | 1 | 2 | 2 | 2 | 2 | 1 | 2 | 2 | 2 | 4.00 | 1.00 | 4.00 | 2.00 |
| 298 | 1 | 5.00  | 3.00 | 2.00 | 2.00 | 2.00 | 1 | 2 | 2 | 1 | 1 | 2 | 2 | 2 | 2 | 2 | 2 | 2 | 2 | 2 | 2 | 4.00 | 1.00 | 4.00 | 2.00 |
| 299 | 1 | 5.00  | 3.00 | 2.00 | 2.00 | 2.00 | 3 | 3 | 1 | 1 | 2 | 2 | 2 | 2 | 2 | 2 | 2 | 2 | 2 | 2 | 2 | 3.00 | 2.00 | 3.00 | 2.00 |
| 3   | 1 | 12.00 | 4.00 | 1.00 | 2.00 | 1.00 | 1 | 2 | 1 | 1 | 2 | 1 | 1 | 1 | 1 | 2 | 1 | 2 | 1 | 1 | 1 | 4.00 | 1.00 | 4.00 | 2.00 |
| 3   | 1 | 12.00 | 2.00 | 2.00 | 2.00 | 1.00 | 3 | 3 | 2 | 1 | 2 | 1 | 1 | 1 | 1 | 2 | 1 | 2 | 1 | 1 | 1 | 3.00 | 2.00 | 3.00 | 2.00 |
| 30  | 1 | 1.00  | 0.00 | 2.00 | 2.00 | 2.00 | 3 | 1 | 2 | 1 | 2 | 2 | 2 | 2 | 2 | 1 | 2 | 2 | 2 | 1 | 2 | 3.00 | 2.00 | 4.00 | 1.00 |
| 300 | 1 | 12.00 | 3.00 | 2.00 | 2.00 | 2.00 | 3 | 3 | 1 | 1 | 2 | 2 | 1 | 2 | 1 | 2 | 2 | 2 | 2 | 1 | 2 | 3.00 | 2.00 | 3.00 | 2.00 |
| 301 | 1 | 5.00  | 3.00 | 2.00 | 2.00 | 2.00 | 1 | 2 | 2 | 1 | 1 | 2 | 1 | 2 | 2 | 1 | 2 | 2 | 2 | 1 | 2 | 4.00 | 1.00 | 4.00 | 2.00 |
| 302 | 1 | 12.00 | 4.00 | 2.00 | 2.00 | 1.00 | 1 | 2 | 2 | 1 | 2 | 2 | 1 | 1 | 2 | 2 | 2 | 2 | 2 | 2 | 2 | 4.00 | 1.00 | 4.00 | 2.00 |
| 303 | 1 | 2.00  | 0.00 | 2.00 | 2.00 | 2.00 | 2 | 2 | 2 | 1 | 2 | 2 | 2 | 1 | 2 | 2 | 2 | 2 | 2 | 2 | 2 | 4.00 | 2.00 | 4.00 | 2.00 |
| 304 | 1 | 2.00  | 0.00 | 2.00 | 2.00 | 2.00 | 2 | 2 | 2 | 2 | 1 | 2 | 2 | 2 | 1 | 2 | 2 | 2 | 2 | 2 | 2 | 4.00 | 2.00 | 4.00 | 2.00 |
| 305 | 1 | 12.00 | 3.00 | 2.00 | 2.00 | 2.00 | 2 | 3 | 1 | 2 | 2 | 2 | 1 | 2 | 2 | 2 | 2 | 2 | 2 | 2 | 2 | 4.00 | 2.00 | 3.00 | 2.00 |
| 305 | 1 | 4.00  | 3.00 | 2.00 | 2.00 | 2.00 | 2 | 3 | 1 | 2 | 2 | 2 | 2 | 2 | 2 | 2 | 2 | 2 | 2 | 2 | 2 | 4.00 | 2.00 | 3.00 | 2.00 |
| 305 | 1 | 4.00  | 3.00 | 2.00 | 2.00 | 2.00 | 2 | 3 | 2 | 2 | 2 | 2 | 2 | 2 | 2 | 2 | 2 | 2 | 2 | 2 | 2 | 4.00 | 2.00 | 3.00 | 2.00 |
| 306 | 1 | 12.00 | 3.00 | 2.00 | 2.00 | 1.00 | 2 | 3 | 2 | 1 | 1 | 2 | 2 | 1 | 2 | 2 | 2 | 2 | 2 | 2 | 2 | 4.00 | 2.00 | 3.00 | 2.00 |
| 307 | 1 | 1.00  | 0.00 | 2.00 | 2.00 | 2.00 | 3 | 3 | 2 | 1 | 1 | 2 | 2 | 2 | 2 | 2 | 2 | 2 | 2 | 2 | 2 | 3.00 | 2.00 | 3.00 | 2.00 |
| 308 | 1 | 2.00  | 0.00 | 2.00 | 2.00 | 2.00 | 3 | 3 | 1 | 2 | 1 | 2 | 2 | 1 | 2 | 2 | 2 | 2 | 2 | 2 | 2 | 3.00 | 2.00 | 3.00 | 2.00 |
| 309 | 1 | 4.00  | 1.00 | 2.00 | 2.00 | 2.00 | 2 | 2 | 2 | 1 | 1 | 2 | 1 | 2 | 2 | 2 | 2 | 2 | 2 | 2 | 2 | 4.00 | 2.00 | 4.00 | 2.00 |
| 31  | 1 | 12.00 | 4.00 | 2.00 | 2.00 | 1.00 | 1 | 3 | 2 | 1 | 1 | 1 | 1 | 1 | 2 | 2 | 2 | 2 | 2 | 1 | 1 | 4.00 | 1.00 | 3.00 | 2.00 |
| 31  | 1 | 12.00 | 4.00 | 2.00 | 2.00 | 1.00 | 2 | 2 | 1 | 1 | 1 | 1 | 1 | 2 | 2 | 2 | 2 | 2 | 2 | 1 | 1 | 4.00 | 2.00 | 4.00 | 2.00 |
| 310 | 1 | 12.00 | 3.00 | 1.00 | 1.00 | 2.00 | 2 | 2 | 1 | 1 | 2 | 2 | 1 | 2 | 2 | 1 | 2 | 2 | 1 | 2 | 2 | 4.00 | 2.00 | 4.00 | 2.00 |
| 311 | 1 | 5.00  | 3.00 | 2.00 | 2.00 | 2.00 | 2 | 2 | 1 | 1 | 2 | 2 | 1 | 1 | 1 | 2 | 2 | 2 | 2 | 1 | 2 | 4.00 | 2.00 | 4    |      |











|     |   |       |      |      |      |      |   |   |   |   |   |   |   |   |   |   |   |   |   |   |   |      |      |      |      |
|-----|---|-------|------|------|------|------|---|---|---|---|---|---|---|---|---|---|---|---|---|---|---|------|------|------|------|
| 730 | 1 | 5.00  | 3.00 | 2.00 | 2.00 | 2.00 | 2 | 3 | 1 | 2 | 1 | 2 | 2 | 2 | 2 | 1 | 2 | 2 | 1 | 2 | 2 | 4.00 | 2.00 | 3.00 | 2.00 |
| 731 | 1 | 4.00  | 3.00 | 2.00 | 2.00 | 2.00 | 2 | 3 | 2 | 1 | 2 | 1 | 1 | 2 | 2 | 1 | 1 | 2 | 2 | 1 | 2 | 4.00 | 2.00 | 3.00 | 2.00 |
| 732 | 1 | 4.00  | 3.00 | 2.00 | 2.00 | 2.00 | 2 | 3 | 2 | 1 | 1 | 2 | 1 | 2 | 2 | 1 | 2 | 2 | 2 | 2 | 2 | 4.00 | 2.00 | 3.00 | 2.00 |
| 733 | 1 | 5.00  | 3.00 | 2.00 | 2.00 | 2.00 | 3 | 3 | 1 | 2 | 1 | 2 | 2 | 1 | 2 | 2 | 2 | 2 | 2 | 2 | 2 | 3.00 | 2.00 | 3.00 | 2.00 |
| 734 | 1 | 12.00 | 3.00 | 2.00 | 2.00 | 2.00 | 3 | 3 | 1 | 1 | 1 | 1 | 1 | 1 | 2 | 2 | 2 | 2 | 2 | 1 | 2 | 3.00 | 2.00 | 3.00 | 2.00 |
| 735 | 1 | 5.00  | 3.00 | 2.00 | 2.00 | 2.00 | 2 | 3 | 2 | 1 | 2 | 2 | 2 | 2 | 2 | 2 | 2 | 2 | 2 | 1 | 2 | 4.00 | 2.00 | 3.00 | 2.00 |
| 736 | 1 | 12.00 | 4.00 | 2.00 | 2.00 | 2.00 | 2 | 3 | 1 | 1 | 1 | 1 | 1 | 2 | 1 | 2 | 2 | 2 | 2 | 2 | 2 | 4.00 | 2.00 | 3.00 | 2.00 |
| 737 | 1 | 12.00 | 3.00 | 2.00 | 2.00 | 2.00 | 3 | 3 | 1 | 1 | 1 | 2 | 1 | 1 | 2 | 2 | 2 | 2 | 2 | 2 | 2 | 3.00 | 2.00 | 3.00 | 2.00 |
| 738 | 1 | 5.00  | 2.00 | 2.00 | 2.00 | 2.00 | 3 | 3 | 1 | 1 | 1 | 2 | 2 | 2 | 2 | 2 | 2 | 2 | 1 | 2 | 2 | 3.00 | 2.00 | 3.00 | 2.00 |
| 739 | 1 | 12.00 | 4.00 | 2.00 | 2.00 | 2.00 | 2 | 3 | 1 | 2 | 2 | 2 | 1 | 1 | 2 | 2 | 2 | 1 | 2 | 2 | 2 | 4.00 | 2.00 | 3.00 | 2.00 |
| 74  | 1 | 5.00  | 2.00 | 2.00 | 2.00 | 2.00 | 3 | 3 | 1 | 1 | 2 | 2 | 2 | 2 | 2 | 2 | 2 | 2 | 2 | 2 | 1 | 3.00 | 2.00 | 3.00 | 2.00 |
| 740 | 1 | 4.00  | 3.00 | 2.00 | 2.00 | 2.00 | 2 | 3 | 2 | 1 | 1 | 2 | 1 | 2 | 2 | 2 | 2 | 2 | 2 | 1 | 1 | 4.00 | 2.00 | 3.00 | 2.00 |
| 741 | 1 | 5.00  | 3.00 | 2.00 | 2.00 | 2.00 | 2 | 2 | 1 | 2 | 2 | 1 | 2 | 2 | 2 | 2 | 2 | 1 | 2 | 2 | 1 | 4.00 | 2.00 | 4.00 | 2.00 |
| 742 | 1 | 5.00  | 3.00 | 2.00 | 2.00 | 2.00 | 2 | 2 | 1 | 1 | 1 | 2 | 1 | 2 | 1 | 2 | 2 | 2 | 2 | 2 | 1 | 4.00 | 2.00 | 4.00 | 2.00 |
| 743 | 1 | 12.00 | 3.00 | 2.00 | 2.00 | 2.00 | 2 | 2 | 1 | 1 | 1 | 2 | 1 | 2 | 2 | 2 | 2 | 2 | 1 | 1 | 1 | 4.00 | 2.00 | 4.00 | 2.00 |
| 744 | 1 | 4.00  | 3.00 | 2.00 | 2.00 | 2.00 | 2 | 2 | 1 | 2 | 1 | 2 | 1 | 2 | 2 | 1 | 2 | 1 | 2 | 2 | 2 | 4.00 | 2.00 | 4.00 | 2.00 |
| 745 | 1 | 12.00 | 4.00 | 2.00 | 2.00 | 1.00 | 2 | 3 | 1 | 2 | 1 | 2 | 1 | 1 | 2 | 1 | 2 | 2 | 2 | 2 | 2 | 4.00 | 2.00 | 3.00 | 2.00 |
| 745 | 1 | 12.00 | 4.00 | 1.00 | 2.00 | 2.00 | 2 | 3 | 1 | 2 | 1 | 2 | 1 | 1 | 2 | 1 | 1 | 2 | 2 | 2 | 2 | 4.00 | 2.00 | 3.00 | 2.00 |
| 745 | 1 | 12.00 | 4.00 | 1.00 | 1.00 | 2.00 | 2 | 3 | 2 | 1 | 2 | 1 | 2 | 1 | 1 | 2 | 1 | 2 | 2 | 2 | 2 | 4.00 | 2.00 | 3.00 | 2.00 |
| 746 | 1 | 12.00 | 4.00 | 2.00 | 2.00 | 1.00 | 2 | 3 | 1 | 1 | 2 | 2 | 1 | 1 | 2 | 1 | 2 | 2 | 1 | 2 | 2 | 4.00 | 2.00 | 3.00 | 2.00 |
| 746 | 1 | 12.00 | 4.00 | 1.00 | 2.00 | 2.00 | 2 | 3 | 1 | 1 | 2 | 2 | 1 | 1 | 2 | 1 | 2 | 2 | 2 | 1 | 2 | 4.00 | 2.00 | 3.00 | 2.00 |
| 746 | 1 | 12.00 | 4.00 | 1.00 | 1.00 | 2.00 | 2 | 3 | 2 | 1 | 2 | 2 | 1 | 1 | 2 | 1 | 2 | 2 | 1 | 2 | 2 | 4.00 | 2.00 | 3.00 | 2.00 |
| 747 | 1 | 12.00 | 3.00 | 2.00 | 2.00 | 2.00 | 1 | 2 | 2 | 1 | 2 | 1 | 2 | 2 | 1 | 2 | 2 | 1 | 2 | 1 | 2 | 4.00 | 1.00 | 4.00 | 2.00 |
| 748 | 1 | 5.00  | 3.00 | 2.00 | 2.00 | 2.00 | 1 | 2 | 1 | 2 | 2 | 2 | 2 | 2 | 2 | 2 | 2 | 2 | 1 | 2 | 2 | 4.00 | 1.00 | 4.00 | 2.00 |
| 749 | 1 | 5.00  | 3.00 | 2.00 | 2.00 | 2.00 | 2 | 3 | 1 | 2 | 1 | 2 | 2 | 2 | 2 | 2 | 2 | 2 | 2 | 1 | 2 | 4.00 | 2.00 | 3.00 | 2.00 |
| 749 | 1 | 5.00  | 2.00 | 2.00 | 2.00 | 2.00 | 2 | 3 | 2 | 2 | 1 | 2 | 2 | 2 | 2 | 2 | 2 | 2 | 2 | 2 | 1 | 4.00 | 2.00 | 3.00 | 2.00 |
| 749 | 1 | 5.00  | 2.00 | 2.00 | 2.00 | 2.00 | 3 | 3 | 1 | 2 | 1 | 2 | 2 | 2 | 2 | 2 | 2 | 2 | 2 | 2 | 1 | 3.00 | 2.00 | 3.00 | 2.00 |
| 75  | 1 | 12.00 | 3.00 | 2.00 | 2.00 | 2.00 | 2 | 3 | 1 | 2 | 2 | 1 | 1 | 2 | 1 | 2 | 2 | 2 | 1 | 1 | 2 | 4.00 | 2.00 | 3.00 | 2.00 |
| 750 | 1 | 12.00 | 3.00 | 2.00 | 2.00 | 2.00 | 3 | 3 | 2 | 2 | 2 | 2 | 1 | 1 | 2 | 2 | 2 | 1 | 2 | 2 | 2 | 3.00 | 2.00 | 3.00 | 2.00 |
| 751 | 1 | 12.00 | 3.00 | 2.00 | 2.00 | 2.00 | 3 | 3 | 2 | 1 | 2 | 1 | 1 | 2 | 2 | 1 | 2 | 2 | 2 | 2 | 2 | 3.00 | 2.00 | 3.00 | 2.00 |
| 752 | 1 | 5.00  | 3.00 | 2.00 | 2.00 | 2.00 | 3 | 3 | 1 | 2 | 2 | 1 | 2 | 1 | 2 | 1 | 2 | 2 | 2 | 1 | 1 | 3.00 | 2.00 | 3.00 | 2.00 |
| 753 | 1 | 5.00  | 3.00 | 2.00 | 2.00 | 2.00 | 2 | 2 | 2 | 2 | 1 | 2 | 2 | 2 | 2 | 2 | 2 | 2 | 2 | 2 | 2 | 4.00 | 2.00 | 4.00 | 2.00 |
| 754 | 1 | 12.00 | 4.00 | 2.00 | 2.00 | 2.00 | 2 | 2 | 1 | 2 | 1 | 2 | 1 | 2 | 2 | 2 | 2 | 2 | 2 | 2 | 2 | 4.00 | 2.00 | 4.00 | 2.00 |
| 755 | 1 | 12.00 | 4.00 | 2.00 | 2.00 | 2.00 | 2 | 2 | 1 | 1 | 2 | 1 | 1 | 2 | 2 | 2 | 2 | 2 | 1 | 1 | 1 | 4.00 | 2.00 | 4.00 | 2.00 |
| 756 | 1 | 5.00  | 3.00 | 2.00 | 2.00 | 2.00 | 2 | 2 | 1 | 2 | 1 | 2 | 1 | 2 | 1 | 2 | 1 | 2 | 1 | 2 | 1 | 4.00 | 2.00 | 4.00 | 2.00 |
| 756 | 1 | 5.00  | 3.00 | 2.00 | 2.00 | 2.00 | 2 | 2 | 1 | 2 | 1 | 2 | 1 | 2 | 1 | 2 | 1 | 2 | 1 | 2 | 1 | 4.00 | 2.00 | 4.00 | 2.00 |
| 757 | 1 | 4.00  | 3.00 | 2.00 | 2.00 | 2.00 | 2 | 3 | 2 | 1 | 2 | 2 | 1 | 2 | 2 | 2 | 2 | 2 | 2 | 2 | 2 | 4.00 | 2.00 | 3.00 | 2.00 |
| 758 | 1 | 12.00 | 4.00 | 1.00 | 2.00 | 2.00 | 2 | 3 | 2 | 2 | 1 | 2 | 1 | 1 | 2 | 2 | 2 | 2 | 2 | 1 | 2 | 4.00 | 2.00 | 3.00 | 2.00 |
| 759 | 1 | 5.00  | 3.00 | 2.00 | 2.00 | 2.00 | 3 | 3 | 1 | 2 | 1 | 2 | 2 | 2 | 1 | 2 | 2 | 2 | 2 | 2 | 2 | 3.00 | 2.00 | 3.00 | 2.00 |
| 76  | 1 | 12.00 | 3.00 | 2.00 | 2.00 | 1.00 | 2 | 3 | 2 | 1 | 2 | 2 | 1 | 2 | 2 | 2 | 2 | 2 | 2 | 1 | 2 | 4.00 | 2.00 | 3.00 | 2.00 |
| 760 | 1 | 12.00 | 3.00 | 2.00 | 2.00 | 2.00 | 3 | 3 | 1 | 1 | 2 | 2 | 1 | 1 | 2 | 2 | 2 | 2 | 2 | 2 | 2 | 3.00 | 2.00 | 3.00 | 2.00 |
| 761 | 1 | 4.00  | 3.00 | 2.00 | 2.00 | 2.00 | 2 | 3 | 2 | 1 | 2 | 1 | 2 | 2 | 2 | 2 | 2 | 2 | 1 | 2 | 2 | 4.00 | 2.00 | 3.00 | 2.00 |
| 762 | 1 | 5.00  | 3.00 | 2.00 | 2.00 | 2.00 | 2 | 3 | 2 | 1 | 2 | 2 | 2 | 2 | 2 | 1 | 2 | 2 | 1 | 2 | 2 | 4.00 | 2.00 | 3.00 | 2.00 |
| 763 | 1 | 12.00 | 4.00 | 2.00 | 2.00 | 2.00 | 2 | 3 | 1 | 2 | 1 | 2 | 1 | 2 | 2 | 1 | 2 | 2 | 2 | 1 | 2 | 4.00 | 2.00 | 3.00 | 2.00 |
| 764 | 1 | 5.00  | 3.00 | 2.00 | 2.00 | 2.00 | 2 | 3 | 2 | 1 | 2 | 1 | 2 | 2 | 2 | 1 | 2 | 2 | 1 | 1 | 2 | 4.00 | 2.00 | 3.00 | 2.00 |
| 764 | 1 | 5.00  | 3.00 | 2.00 | 2.00 | 2.00 | 2 | 3 | 2 | 1 | 2 | 1 | 2 | 2 | 2 | 1 | 2 | 2 | 2 | 1 | 2 | 4.00 | 2.00 | 3.00 | 2.00 |
| 765 | 1 | 12.00 | 4.00 | 2.00 | 2.00 | 1.00 | 2 | 3 | 1 | 2 | 1 | 1 | 1 | 1 | 2 | 1 | 1 | 2 | 2 | 1 | 2 | 4.00 | 2.00 | 3.00 | 2.00 |
| 765 | 1 | 12.00 | 3.00 | 2.00 | 2.00 | 2.00 | 3 | 3 | 2 | 2 | 1 | 1 | 1 | 1 | 2 | 1 | 1 | 2 | 2 | 1 | 2 | 3.00 | 2.00 | 3.00 | 2.00 |
| 766 | 1 | 12.00 | 3.00 | 2.00 | 2.00 | 2.00 | 2 | 3 | 1 | 1 | 2 | 2 | 1 | 2 | 2 | 1 | 2 | 2 | 2 | 2 | 2 | 4.00 | 2.00 | 3.00 | 2.00 |
| 766 | 1 | 5.00  | 3.00 | 2.00 | 2.00 | 1.00 | 3 | 3 | 1 | 1 | 2 | 2 | 1 | 2 | 2 | 1 | 2 | 2 | 2 | 2 | 2 | 3.00 | 2.00 | 3.00 | 2.00 |
| 766 | 1 | 5.00  | 3.00 | 2.00 | 2.00 | 1.00 | 3 | 3 | 2 | 1 | 2 | 2 | 1 | 2 | 2 | 1 | 2 | 2 | 2 | 2 | 2 | 3.00 | 2.00 | 3.00 | 2.00 |
| 767 | 1 | 12.00 | 4.00 | 2.00 | 2.00 | 1.00 | 2 | 2 | 1 | 1 | 2 | 1 | 1 | 1 | 1 | 1 | 2 | 1 | 2 | 1 | 2 | 4.00 | 2.00 | 4.00 | 2.00 |
| 767 | 1 | 12.00 | 4.00 | 2.00 | 2.00 | 1.00 | 2 | 3 | 1 | 1 | 2 | 1 | 1 | 1 | 1 | 1 | 2 | 1 | 2 | 1 | 2 | 4.00 | 2.00 | 3.00 | 2.00 |
| 767 | 1 | 12.00 | 4.00 | 2.00 | 2.00 | 1.00 | 2 | 3 | 2 | 1 | 2 | 1 | 1 | 1 | 1 | 1 | 2 | 1 | 2 | 1 | 2 | 4.00 | 2.00 | 3.00 | 2.00 |
| 767 | 1 | 12.00 | 4.00 | 2.00 | 2.00 | 1.00 | 2 | 3 | 2 | 1 | 2 | 1 | 1 | 1 | 1 | 1 | 2 | 1 | 2 | 1 | 2 | 4.00 | 2.00 | 3.00 | 2.00 |
| 768 | 1 | 2.00  | 0.00 | 2.00 | 2.00 | 2.00 | 2 | 2 | 2 | 2 | 2 | 2 | 1 | 2 | 2 | 2 | 2 | 2 | 2 | 2 | 2 | 4.00 | 2.00 | 4.00 | 2.00 |
| 769 | 1 | 5.00  | 3.00 | 2.00 | 2.00 | 2.00 | 2 | 3 | 1 | 1 | 1 | 2 | 2 | 1 | 1 | 2 | 2 | 2 | 2 | 2 | 2 | 4.00 | 2.00 | 3.00 | 2.00 |
| 769 | 1 | 5.00  | 3.00 | 2.00 | 2.00 | 2.00 | 3 | 3 | 1 | 1 | 1 | 2 | 2 | 1 | 1 | 2 | 2 | 2 | 2 | 2 | 2 | 3.00 | 2.00 | 3.00 | 2.00 |
| 769 | 1 | 5.00  | 3.00 | 2.00 | 2.00 | 2.00 | 3 | 3 | 2 | 1 | 1 | 2 | 2 | 1 | 1 | 2 | 2 | 2 | 2 | 2 | 2 | 3.00 | 2.00 | 3.00 | 2.00 |
| 77  | 1 | 5.00  | 3.00 | 1.00 | 2.00 | 2.00 | 2 | 3 | 1 | 2 | 2 | 2 | 2 | 2 | 2 | 1 | 2 | 2 | 2 | 2 | 2 | 4.00 | 2.00 | 3.00 | 2.00 |
| 770 | 1 | 12.00 | 4.00 | 2.00 | 2.00 | 1.00 | 2 | 3 | 1 | 1 | 1 | 1 | 1 | 1 | 1 | 1 | 2 | 2 | 2 | 1 | 2 | 4.00 | 2.00 | 3.00 | 2.00 |
| 770 | 1 | 12.00 | 2.00 | 2.00 | 2.00 | 1.00 | 3 | 3 | 2 | 1 | 1 | 1 | 1 | 1 | 1 | 1 | 2 | 2 | 2 | 2 | 2 | 3.00 | 2.00 | 3.00 | 2.00 |
| 771 | 1 | 12.00 | 3.00 | 1.00 | 1.00 | 1.00 | 2 | 2 | 1 | 2 | 2 | 2 | 1 | 2 | 2 | 2 | 2 | 2 | 2 | 2 | 2 | 4.00 | 2.00 | 4.00 | 2.00 |
| 772 | 1 | 12.00 | 4.00 | 2.00 | 2.00 | 1.00 | 2 | 2 | 1 | 2 | 2 | 2 | 1 | 1 | 2 | 2 | 2 | 2 | 2 | 2 | 2 | 4.00 | 2.00 | 4.00 | 2.00 |
| 773 | 1 | 12.00 | 3.00 | 2.00 | 2.00 | 2.00 | 1 | 1 | 2 | 2 | 2 | 1 | 2 | 2 | 1 | 2 | 2 | 2 | 2 | 2 | 2 | 4.00 |      |      |      |













|      |   |       |        |      |      |      |   |   |   |   |   |   |   |   |   |   |   |   |   |   |   |      |      |      |      |
|------|---|-------|--------|------|------|------|---|---|---|---|---|---|---|---|---|---|---|---|---|---|---|------|------|------|------|
| L12  | 1 | 12.00 | 5.00   | 2.00 | 2.00 | 1.00 | 1 | 1 | 1 | 1 | 2 | 1 | 1 | 1 | 2 | 2 | 2 | 2 | 1 | 1 | 1 | 4.00 | 1.00 | 4.00 | 1.00 |
| L120 | 1 | 5.00  | 3.00   | 2.00 | 2.00 | 2.00 | 2 | 3 | 1 | 2 | 1 | 1 | 2 | 1 | 2 | 1 | 2 | 1 | 2 | 1 | 1 | 4.00 | 2.00 | 3.00 | 2.00 |
| L121 | 1 | 4.00  | 3.00   | 2.00 | 2.00 | 2.00 | 2 | 3 | 2 | 1 | 2 | 2 | 1 | 2 | 2 | 2 | 2 | 2 | 2 | 2 | 2 | 4.00 | 2.00 | 3.00 | 2.00 |
| L122 | 1 | 12.00 | 4.00   | 1.00 | 2.00 | 2.00 | 2 | 3 | 2 | 2 | 1 | 1 | 1 | 2 | 1 | 2 | 2 | 2 | 2 | 1 | 2 | 4.00 | 2.00 | 3.00 | 2.00 |
| L123 | 1 | 5.00  | 3.00   | 2.00 | 2.00 | 2.00 | 2 | 3 | 1 | 2 | 2 | 1 | 2 | 2 | 1 | 2 | 2 | 2 | 2 | 2 | 2 | 4.00 | 2.00 | 3.00 | 2.00 |
| L123 | 1 | 5.00  | 3.00   | 2.00 | 2.00 | 2.00 | 3 | 3 | 1 | 2 | 1 | 2 | 2 | 1 | 2 | 2 | 2 | 2 | 2 | 2 | 2 | 3.00 | 2.00 | 3.00 | 2.00 |
| L123 | 1 | 5.00  | 3.00   | 2.00 | 2.00 | 2.00 | 3 | 3 | 2 | 2 | 1 | 2 | 2 | 1 | 2 | 2 | 2 | 2 | 2 | 2 | 2 | 3.00 | 2.00 | 3.00 | 2.00 |
| L124 | 1 | 12.00 | 4.00   | 2.00 | 2.00 | 1.00 | 2 | 3 | 1 | 1 | 2 | 2 | 1 | 1 | 2 | 2 | 2 | 2 | 2 | 2 | 2 | 4.00 | 2.00 | 3.00 | 2.00 |
| L124 | 1 | 12.00 | 3.00   | 2.00 | 2.00 | 2.00 | 3 | 3 | 1 | 1 | 2 | 2 | 1 | 1 | 2 | 2 | 2 | 2 | 2 | 2 | 2 | 3.00 | 2.00 | 3.00 | 2.00 |
| L124 | 1 | 12.00 | 3.00   | 2.00 | 2.00 | 2.00 | 3 | 3 | 2 | 1 | 2 | 2 | 1 | 1 | 2 | 2 | 2 | 2 | 2 | 2 | 2 | 3.00 | 2.00 | 3.00 | 2.00 |
| L13  | 1 | 5.00  | 3.00   | 2.00 | 2.00 | 1.00 | 3 | 3 | 2 | 1 | 1 | 2 | 1 | 2 | 2 | 2 | 2 | 2 | 1 | 2 | 2 | 3.00 | 2.00 | 3.00 | 2.00 |
| L14  | 1 | 1.00  | 0.00   | 2.00 | 2.00 | 2.00 | 3 | 3 | 2 | 1 | 2 | 2 | 2 | 2 | 2 | 1 | 1 | 2 | 1 | 2 | 2 | 3.00 | 2.00 | 3.00 | 2.00 |
| L15  | 1 | 12.00 | 5.00   | 2.00 | 2.00 | 1.00 | 1 | 2 | 1 | 2 | 1 | 2 | 1 | 1 | 2 | 2 | 2 | 2 | 1 | 2 | 2 | 4.00 | 1.00 | 4.00 | 2.00 |
| L16  | 1 | 5.00  | 3.00   | 2.00 | 2.00 | 2.00 | 1 | 2 | 2 | 1 | 2 | 2 | 1 | 2 | 2 | 1 | 1 | 2 | 1 | 1 | 2 | 4.00 | 1.00 | 4.00 | 2.00 |
| L17  | 1 | 1.00  | 0.00   | 2.00 | 2.00 | 2.00 | 3 | 3 | 2 | 1 | 2 | 2 | 2 | 2 | 2 | 2 | 2 | 2 | 2 | 2 | 2 | 3.00 | 2.00 | 3.00 | 2.00 |
| L18  | 1 | 12.00 | 3.00   | 2.00 | 2.00 | 2.00 | 3 | 3 | 1 | 1 | 2 | 2 | 1 | 1 | 2 | 2 | 2 | 1 | 2 | 2 | 2 | 3.00 | 2.00 | 3.00 | 2.00 |
| L19  | 1 | 12.00 | 3.00   | 2.00 | 2.00 | 2.00 | 3 | 3 | 1 | 2 | 1 | 2 | 1 | 1 | 2 | 2 | 2 | 2 | 2 | 1 | 2 | 3.00 | 2.00 | 3.00 | 2.00 |
| L2   | 1 | 5.00  | 3.00   | 2.00 | 2.00 | 2.00 | 2 | 3 | 2 | 1 | 1 | 2 | 2 | 2 | 2 | 2 | 2 | 2 | 2 | 2 | 2 | 4.00 | 2.00 | 3.00 | 2.00 |
| L20  | 1 | 1.00  | 0.00   | 2.00 | 2.00 | 2.00 | 3 | 3 | 2 | 1 | 1 | 2 | 2 | 2 | 2 | 1 | 2 | 2 | 1 | 1 | 2 | 3.00 | 2.00 | 3.00 | 2.00 |
| L21  | 1 | 12.00 | 3.00   | 2.00 | 2.00 | 2.00 | 1 | 1 | 1 | 1 | 2 | 2 | 1 | 2 | 2 | 1 | 1 | 2 | 1 | 2 | 2 | 4.00 | 1.00 | 4.00 | 1.00 |
| L22  | 1 | 12.00 | 5.00   | 2.00 | 2.00 | 1.00 | 1 | 1 | 1 | 2 | 2 | 1 | 1 | 2 | 1 | 2 | 2 | 2 | 2 | 1 | 2 | 4.00 | 1.00 | 4.00 | 1.00 |
| L23  | 1 | 5.00  | 3.00   | 2.00 | 2.00 | 2.00 | 2 | 2 | 1 | 1 | 1 | 2 | 2 | 2 | 2 | 2 | 2 | 2 | 2 | 2 | 2 | 4.00 | 2.00 | 4.00 | 2.00 |
| L24  | 1 | 4.00  | 3.00   | 2.00 | 2.00 | 2.00 | 2 | 2 | 2 | 1 | 2 | 2 | 1 | 2 | 2 | 2 | 2 | 2 | 2 | 2 | 2 | 4.00 | 2.00 | 4.00 | 2.00 |
| L25  | 1 | 12.00 | 4.00   | 2.00 | 2.00 | 1.00 | 1 | 3 | 1 | 1 | 1 | 2 | 1 | 1 | 2 | 2 | 2 | 2 | 2 | 2 | 2 | 4.00 | 1.00 | 3.00 | 2.00 |
| L26  | 1 | 5.00  | 3.00   | 2.00 | 2.00 | 2.00 | 1 | 3 | 1 | 2 | 1 | 2 | 2 | 1 | 2 | 2 | 2 | 2 | 1 | 2 | 2 | 4.00 | 1.00 | 3.00 | 2.00 |
| L27  | 1 | 2.00  | 0.00   | 2.00 | 2.00 | 2.00 | 2 | 3 | 2 | 1 | 2 | 2 | 1 | 2 | 2 | 2 | 2 | 2 | 1 | 2 | 2 | 4.00 | 2.00 | 3.00 | 2.00 |
| L28  | 1 | 12.00 | 4.00   | 2.00 | 2.00 | 1.00 | 2 | 3 | 1 | 1 | 1 | 2 | 1 | 1 | 2 | 2 | 2 | 2 | 2 | 2 | 2 | 4.00 | 2.00 | 3.00 | 2.00 |
| L28  | 1 | 12.00 | 4.00   | 1.00 | 2.00 | 2.00 | 2 | 3 | 1 | 1 | 1 | 2 | 1 | 1 | 2 | 2 | 2 | 2 | 2 | 2 | 2 | 4.00 | 2.00 | 3.00 | 2.00 |
| L28  | 1 | 12.00 | 4.00   | 1.00 | 2.00 | 2.00 | 2 | 3 | 2 | 1 | 1 | 2 | 1 | 1 | 2 | 2 | 2 | 2 | 2 | 2 | 2 | 4.00 | 2.00 | 3.00 | 2.00 |
| L29  | 1 | 2.00  | 0.00   | 2.00 | 2.00 | 2.00 | 2 | 3 | 2 | 2 | 2 | 2 | 1 | 2 | 2 | 2 | 2 | 2 | 2 | 2 | 2 | 4.00 | 2.00 | 3.00 | 2.00 |
| L3   | 1 | 5.00  | 3.00   | 2.00 | 2.00 | 2.00 | 2 | 2 | 1 | 1 | 2 | 2 | 2 | 2 | 2 | 2 | 2 | 2 | 2 | 1 | 2 | 4.00 | 2.00 | 4.00 | 2.00 |
| L30  | 1 | 12.00 | 3.00   | 2.00 | 2.00 | 2.00 | 2 | 3 | 1 | 2 | 1 | 1 | 1 | 2 | 2 | 2 | 2 | 1 | 1 | 1 | 2 | 4.00 | 2.00 | 3.00 | 2.00 |
| L30  | 1 | 4.00  | 3.00   | 2.00 | 2.00 | 2.00 | 2 | 3 | 1 | 2 | 1 | 1 | 1 | 2 | 2 | 2 | 2 | 1 | 1 | 1 | 2 | 4.00 | 2.00 | 3.00 | 2.00 |
| L30  | 1 | 4.00  | 3.00   | 2.00 | 2.00 | 2.00 | 2 | 3 | 2 | 2 | 1 | 1 | 1 | 2 | 2 | 2 | 2 | 1 | 1 | 1 | 2 | 4.00 | 2.00 | 3.00 | 2.00 |
| L31  | 1 | 5.00  | 3.00   | 2.00 | 2.00 | 1.00 | 3 | 3 | 2 | 1 | 1 | 2 | 1 | 2 | 2 | 2 | 2 | 2 | 2 | 1 | 2 | 3.00 | 2.00 | 3.00 | 2.00 |
| L32  | 1 | 1.00  | 0.00   | 2.00 | 2.00 | 2.00 | 3 | 3 | 1 | 2 | 2 | 2 | 2 | 2 | 2 | 1 | 2 | 2 | 1 | 2 | 2 | 3.00 | 2.00 | 3.00 | 2.00 |
| L33  | 1 | 12.00 | 3.00   | 2.00 | 2.00 | 2.00 | 1 | 2 | 1 | 2 | 2 | 1 | 1 | 2 | 1 | 1 | 2 | 2 | 2 | 1 | 2 | 4.00 | 1.00 | 4.00 | 2.00 |
| L33  | 1 | 4.00  | 3.00   | 2.00 | 2.00 | 2.00 | 2 | 3 | 1 | 2 | 2 | 1 | 1 | 2 | 2 | 1 | 1 | 2 | 2 | 1 | 2 | 4.00 | 2.00 | 3.00 | 2.00 |
| L33  | 1 | 4.00  | 3.00   | 2.00 | 2.00 | 2.00 | 2 | 3 | 2 | 2 | 2 | 1 | 1 | 2 | 2 | 1 | 1 | 2 | 2 | 1 | 2 | 4.00 | 2.00 | 3.00 | 2.00 |
| L34  | 1 | 12.00 | 3.00   | 2.00 | 2.00 | 2.00 | 1 | 2 | 2 | 2 | 1 | 2 | 1 | 2 | 2 | 2 | 2 | 2 | 1 | 2 | 2 | 4.00 | 1.00 | 4.00 | 2.00 |
| L35  | 1 | 4.00  | 3.00   | 2.00 | 2.00 | 2.00 | 2 | 3 | 2 | 2 | 2 | 1 | 2 | 2 | 2 | 1 | 2 | 2 | 2 | 2 | 2 | 4.00 | 2.00 | 3.00 | 2.00 |
| L36  | 1 | 4.00  | 3.00   | 2.00 | 2.00 | 2.00 | 2 | 3 | 2 | 2 | 2 | 2 | 1 | 2 | 2 | 2 | 2 | 2 | 2 | 2 | 2 | 4.00 | 2.00 | 3.00 | 2.00 |
| L37  | 1 | 12.00 | 3.00   | 1.00 | 1.00 | 1.00 | 2 | 2 | 1 | 2 | 2 | 2 | 1 | 2 | 2 | 2 | 2 | 1 | 2 | 2 | 2 | 4.00 | 2.00 | 4.00 | 2.00 |
| L38  | 1 | 12.00 | 3.00   | 1.00 | 1.00 | 1.00 | 2 | 2 | 1 | 1 | 2 | 2 | 1 | 2 | 2 | 2 | 2 | 2 | 2 | 2 | 2 | 4.00 | 2.00 | 4.00 | 2.00 |
| L39  | 1 | 4.00  | 3.00   | 2.00 | 2.00 | 2.00 | 2 | 2 | 2 | 2 | 1 | 2 | 2 | 1 | 2 | 2 | 2 | 2 | 2 | 2 | 2 | 4.00 | 2.00 | 4.00 | 2.00 |
| L4   | 1 | 5.00  | 3.00   | 2.00 | 2.00 | 2.00 | 2 | 2 | 1 | 1 | 2 | 2 | 2 | 2 | 2 | 2 | 2 | 2 | 2 | 2 | 2 | 4.00 | 2.00 | 4.00 | 2.00 |
| L40  | 1 | 12.00 | 3.00   | 1.00 | 1.00 | 1.00 | 2 | 2 | 1 | 1 | 2 | 1 | 1 | 2 | 2 | 1 | 2 | 1 | 2 | 1 | 2 | 4.00 | 2.00 | 4.00 | 2.00 |
| L41  | 1 | 4.00  | 3.00   | 2.00 | 2.00 | 2.00 | 3 | 3 | 1 | 2 | 1 | 2 | 1 | 2 | 2 | 2 | 1 | 2 | 2 | 2 | 2 | 3.00 | 2.00 | 3.00 | 2.00 |
| L42  | 1 | 4.00  | 3.00   | 2.00 | 2.00 | 2.00 | 3 | 3 | 1 | 1 | 2 | 2 | 1 | 2 | 2 | 2 | 2 | 1 | 2 | 2 | 2 | 3.00 | 2.00 | 3.00 | 2.00 |
| L43  | 1 | 4.00  | 3.00   | 2.00 | 2.00 | 2.00 | 2 | 3 | 2 | 2 | 1 | 1 | 1 | 2 | 2 | 2 | 2 | 2 | 1 | 1 | 2 | 4.00 | 2.00 | 3.00 | 2.00 |
| L44  | 1 | 4.00  | 3.00   | 2.00 | 2.00 | 2.00 | 2 | 3 | 2 | 2 | 2 | 2 | 1 | 2 | 2 | 2 | 1 | 2 | 1 | 2 | 2 | 4.00 | 2.00 | 3.00 | 2.00 |
| L45  | 1 | 12.00 | 3.00   | 1.00 | 2.00 | 1.00 | 2 | 3 | 1 | 1 | 2 | 2 | 1 | 2 | 2 | 2 | 2 | 2 | 2 | 2 | 2 | 4.00 | 2.00 | 3.00 | 2.00 |
| L46  | 1 | 12.00 | 3.00   | 1.00 | 2.00 | 1.00 | 2 | 3 | 1 | 1 | 2 | 2 | 1 | 2 | 2 | 1 | 2 | 2 | 1 | 2 | 2 | 4.00 | 2.00 | 3.00 | 2.00 |
| L47  | 1 | 4.00  | 3.00   | 2.00 | 2.00 | 2.00 | 2 | 2 | 2 | 1 | 2 | 2 | 1 | 2 | 2 | 2 | 2 | 2 | 2 | 2 | 2 | 4.00 | 2.00 | 4.00 | 2.00 |
| L48  | 1 | 12.00 | 4.00   | 1.00 | 2.00 | 2.00 | 2 | 2 | 1 | 1 | 1 | 2 | 1 | 1 | 2 | 1 | 2 | 2 | 2 | 1 | 2 | 4.00 | 2.00 | 4.00 | 2.00 |
| L49  | 1 | 4.00  | 3.00   | 2.00 | 2.00 | 2.00 | 2 | 2 | 2 | 2 | 2 | 2 | 1 | 2 | 2 | 2 | 2 | 2 | 2 | 2 | 2 | 4.00 | 2.00 | 4.00 | 2.00 |
| L5   | 1 | 5.00  | 3.00   | 2.00 | 2.00 | 2.00 | 2 | 2 | 1 | 1 | 2 | 2 | 2 | 2 | 2 | 1 | 2 | 2 | 1 | 2 | 2 | 4.00 | 2.00 | 4.00 | 2.00 |
| L50  | 1 | 12.00 | 3.00   | 1.00 | 2.00 | 1.00 | 2 | 2 | 1 | 2 | 1 | 1 | 2 | 2 | 2 | 2 | 2 | 2 | 2 | 2 | 2 | 4.00 | 2.00 | 4.00 | 2.00 |
| L51  | 1 | 4.00  | 3.00   | 2.00 | 2.00 | 2.00 | 2 | 3 | 2 | 1 | 1 | 2 | 1 | 2 | 2 | 2 | 2 | 2 | 1 | 1 | 2 | 4.00 | 2.00 | 3.00 | 2.00 |
| L52  | 1 | 5.00  | 3.00   | 2.00 | 2.00 | 2.00 | 2 | 3 | 1 | 2 | 2 | 2 | 2 | 2 | 2 | 1 | 2 | 2 | 2 | 1 | 2 | 4.00 | 2.00 | 3.00 | 2.00 |
| L53  | 1 | 4.00  | 3.00   | 2.00 | 2.00 | 2.00 | 2 | 3 | 1 | 2 | 2 | 1 | 1 | 2 | 2 | 1 | 1 | 2 | 2 | 2 | 2 | 4.00 | 2.00 | 3.00 | 2.00 |
| L53  | 1 | 4.00  | 3.00   | 2.00 | 2.00 | 2.00 | 3 | 3 | 1 | 2 | 2 | 1 | 1 | 2 | 2 | 1 | 1 | 2 | 2 | 2 | 2 | 4.00 | 2.00 | 3.00 | 2.00 |
| L54  | 1 | 4.00  | 3.00   | 2.00 | 2.00 | 2.00 | 3 | 3 | 2 | 2 | 1 | 2 | 1 | 2 | 2 | 1 | 2 | 2 | 2 | 2 | 2 | 3.00 | 2.00 | 3.00 | 2.00 |
| L55  | 1 | 5.00  | 3.00   | 2.00 | 2.00 | 1.00 | 3 | 3 | 2 | 1 | 2 | 1 | 1 | 2 | 2 | 1 | 1 | 2 | 2 | 1 | 2 | 3.00 | 2.00 | 3.00 | 2.00 |
| L56  | 1 | 5.00  | 3.00   | 2.00 | 2.00 | 1.00 | 3 | 3 | 2 | 1 | 1 | 1 | 1 | 2 | 2 | 1 | 2 | 2 | 2 | 1 | 2 | 3.00 | 2.00 | 3.00 | 2.00 |
| L57  | 1 | 12.00 | 4.00</ |      |      |      |   |   |   |   |   |   |   |   |   |   |   |   |   |   |   |      |      |      |      |





|     |   |        |        |        |        |        |   |   |   |   |   |   |   |   |   |   |   |   |   |   |   |   |   |      |      |      |      |
|-----|---|--------|--------|--------|--------|--------|---|---|---|---|---|---|---|---|---|---|---|---|---|---|---|---|---|------|------|------|------|
| N69 | 2 | #NULL! | #NULL! | #NULL! | #NULL! | #NULL! | 2 | 3 | 2 | 2 | 2 | 2 | 2 | 2 | 2 | 2 | 2 | 1 | 2 | 2 | 1 | 2 | 2 | 4.00 | 2.00 | 3.00 | 2.00 |
| N7  | 2 | #NULL! | #NULL! | #NULL! | #NULL! | #NULL! | 2 | 3 | 2 | 1 | 2 | 2 | 2 | 2 | 2 | 2 | 2 | 2 | 1 | 1 | 2 | 2 | 2 | 4.00 | 2.00 | 3.00 | 2.00 |
| N70 | 2 | #NULL! | #NULL! | #NULL! | #NULL! | #NULL! | 2 | 2 | 1 | 2 | 1 | 2 | 2 | 2 | 2 | 2 | 2 | 1 | 1 | 2 | 2 | 2 | 2 | 4.00 | 2.00 | 4.00 | 2.00 |
| N71 | 2 | #NULL! | #NULL! | #NULL! | #NULL! | #NULL! | 2 | 2 | 1 | 1 | 1 | 2 | 2 | 2 | 2 | 2 | 2 | 2 | 2 | 2 | 2 | 2 | 2 | 4.00 | 2.00 | 4.00 | 2.00 |
| N72 | 2 | #NULL! | #NULL! | #NULL! | #NULL! | #NULL! | 1 | 3 | 1 | 1 | 2 | 2 | 2 | 2 | 2 | 2 | 2 | 2 | 1 | 2 | 2 | 2 | 2 | 4.00 | 1.00 | 3.00 | 2.00 |
| N73 | 2 | #NULL! | #NULL! | #NULL! | #NULL! | #NULL! | 1 | 3 | 1 | 1 | 1 | 2 | 2 | 2 | 2 | 2 | 2 | 2 | 1 | 2 | 2 | 2 | 2 | 4.00 | 1.00 | 3.00 | 2.00 |
| N74 | 2 | #NULL! | #NULL! | #NULL! | #NULL! | #NULL! | 1 | 1 | 1 | 2 | 2 | 2 | 2 | 2 | 2 | 2 | 2 | 2 | 2 | 2 | 2 | 2 | 2 | 4.00 | 1.00 | 4.00 | 1.00 |
| N75 | 2 | #NULL! | #NULL! | #NULL! | #NULL! | #NULL! | 1 | 2 | 1 | 1 | 2 | 2 | 2 | 1 | 2 | 2 | 2 | 1 | 1 | 2 | 2 | 2 | 2 | 4.00 | 1.00 | 4.00 | 2.00 |
| N76 | 2 | #NULL! | #NULL! | #NULL! | #NULL! | #NULL! | 1 | 1 | 1 | 1 | 1 | 2 | 2 | 2 | 2 | 2 | 2 | 1 | 2 | 2 | 2 | 1 | 2 | 4.00 | 1.00 | 4.00 | 1.00 |
| N77 | 2 | #NULL! | #NULL! | #NULL! | #NULL! | #NULL! | 2 | 2 | 1 | 1 | 2 | 2 | 2 | 2 | 2 | 2 | 2 | 1 | 2 | 2 | 2 | 2 | 2 | 4.00 | 2.00 | 4.00 | 2.00 |
| N78 | 2 | #NULL! | #NULL! | #NULL! | #NULL! | #NULL! | 2 | 2 | 1 | 2 | 1 | 2 | 2 | 2 | 2 | 2 | 1 | 1 | 2 | 2 | 1 | 2 | 2 | 4.00 | 2.00 | 4.00 | 2.00 |
| N79 | 2 | #NULL! | #NULL! | #NULL! | #NULL! | #NULL! | 1 | 2 | 1 | 2 | 2 | 2 | 2 | 2 | 2 | 2 | 1 | 2 | 2 | 2 | 2 | 2 | 2 | 4.00 | 1.00 | 4.00 | 2.00 |
| N8  | 2 | #NULL! | #NULL! | #NULL! | #NULL! | #NULL! | 2 | 3 | 2 | 2 | 2 | 2 | 2 | 2 | 2 | 2 | 2 | 2 | 2 | 2 | 2 | 2 | 2 | 4.00 | 2.00 | 3.00 | 2.00 |
| N80 | 2 | #NULL! | #NULL! | #NULL! | #NULL! | #NULL! | 1 | 2 | 1 | 2 | 2 | 2 | 2 | 2 | 2 | 2 | 2 | 2 | 2 | 2 | 2 | 1 | 2 | 4.00 | 1.00 | 4.00 | 2.00 |
| N81 | 2 | #NULL! | #NULL! | #NULL! | #NULL! | #NULL! | 2 | 2 | 1 | 1 | 2 | 2 | 2 | 2 | 2 | 2 | 2 | 2 | 2 | 2 | 2 | 2 | 2 | 4.00 | 2.00 | 4.00 | 2.00 |
| N82 | 2 | #NULL! | #NULL! | #NULL! | #NULL! | #NULL! | 2 | 2 | 1 | 1 | 1 | 2 | 2 | 2 | 2 | 2 | 2 | 1 | 2 | 2 | 1 | 1 | 2 | 4.00 | 2.00 | 4.00 | 2.00 |
| N83 | 2 | #NULL! | #NULL! | #NULL! | #NULL! | #NULL! | 1 | 1 | 1 | 2 | 1 | 2 | 2 | 2 | 2 | 2 | 1 | 2 | 2 | 2 | 2 | 1 | 2 | 4.00 | 1.00 | 4.00 | 1.00 |
| N84 | 2 | #NULL! | #NULL! | #NULL! | #NULL! | #NULL! | 1 | 1 | 1 | 2 | 2 | 2 | 2 | 2 | 2 | 1 | 2 | 2 | 2 | 2 | 2 | 2 | 2 | 4.00 | 1.00 | 4.00 | 1.00 |
| N85 | 2 | #NULL! | #NULL! | #NULL! | #NULL! | #NULL! | 3 | 3 | 1 | 2 | 2 | 2 | 2 | 2 | 2 | 2 | 2 | 2 | 2 | 2 | 2 | 1 | 2 | 3.00 | 2.00 | 3.00 | 2.00 |
| N86 | 2 | #NULL! | #NULL! | #NULL! | #NULL! | #NULL! | 3 | 2 | 1 | 2 | 1 | 2 | 2 | 1 | 2 | 2 | 2 | 2 | 2 | 2 | 2 | 2 | 2 | 3.00 | 2.00 | 4.00 | 2.00 |
| N87 | 2 | #NULL! | #NULL! | #NULL! | #NULL! | #NULL! | 3 | 3 | 1 | 2 | 1 | 2 | 2 | 2 | 2 | 2 | 2 | 2 | 2 | 2 | 2 | 2 | 2 | 3.00 | 2.00 | 3.00 | 2.00 |
| N88 | 2 | #NULL! | #NULL! | #NULL! | #NULL! | #NULL! | 2 | 2 | 1 | 1 | 2 | 2 | 2 | 2 | 2 | 2 | 1 | 2 | 2 | 2 | 2 | 1 | 2 | 4.00 | 2.00 | 4.00 | 2.00 |
| N89 | 2 | #NULL! | #NULL! | #NULL! | #NULL! | #NULL! | 2 | 2 | 1 | 1 | 1 | 2 | 2 | 2 | 2 | 2 | 1 | 2 | 2 | 1 | 2 | 2 | 2 | 4.00 | 2.00 | 4.00 | 2.00 |
| N9  | 2 | #NULL! | #NULL! | #NULL! | #NULL! | #NULL! | 2 | 3 | 2 | 2 | 1 | 2 | 2 | 2 | 2 | 2 | 1 | 2 | 2 | 2 | 2 | 2 | 2 | 4.00 | 2.00 | 3.00 | 2.00 |
| N90 | 2 | #NULL! | #NULL! | #NULL! | #NULL! | #NULL! | 3 | 3 | 1 | 1 | 2 | 2 | 1 | 2 | 2 | 2 | 1 | 2 | 2 | 1 | 2 | 2 | 2 | 3.00 | 2.00 | 3.00 | 2.00 |
| N91 | 2 | #NULL! | #NULL! | #NULL! | #NULL! | #NULL! | 3 | 3 | 1 | 1 | 2 | 2 | 2 | 2 | 2 | 2 | 1 | 2 | 2 | 2 | 2 | 2 | 2 | 3.00 | 2.00 | 3.00 | 2.00 |
| N92 | 2 | #NULL! | #NULL! | #NULL! | #NULL! | #NULL! | 2 | 3 | 1 | 1 | 2 | 2 | 2 | 2 | 2 | 2 | 2 | 2 | 2 | 2 | 2 | 1 | 2 | 4.00 | 2.00 | 3.00 | 2.00 |
| N93 | 2 | #NULL! | #NULL! | #NULL! | #NULL! | #NULL! | 2 | 3 | 1 | 1 | 2 | 2 | 1 | 2 | 2 | 1 | 2 | 2 | 2 | 2 | 2 | 1 | 2 | 4.00 | 2.00 | 3.00 | 2.00 |
| N94 | 2 | #NULL! | #NULL! | #NULL! | #NULL! | #NULL! | 2 | 2 | 1 | 1 | 1 | 2 | 2 | 2 | 2 | 2 | 2 | 2 | 2 | 2 | 2 | 1 | 2 | 4.00 | 2.00 | 4.00 | 2.00 |
| N95 | 2 | #NULL! | #NULL! | #NULL! | #NULL! | #NULL! | 2 | 2 | 1 | 1 | 1 | 2 | 2 | 2 | 2 | 2 | 2 | 2 | 2 | 2 | 2 | 2 | 2 | 4.00 | 2.00 | 4.00 | 2.00 |
| N96 | 2 | #NULL! | #NULL! | #NULL! | #NULL! | #NULL! | 1 | 1 | 2 | 2 | 2 | 2 | 2 | 2 | 2 | 2 | 1 | 2 | 2 | 2 | 2 | 2 | 2 | 4.00 | 1.00 | 4.00 | 1.00 |
| N97 | 2 | #NULL! | #NULL! | #NULL! | #NULL! | #NULL! | 3 | 2 | 2 | 2 | 1 | 2 | 2 | 2 | 2 | 2 | 1 | 2 | 2 | 2 | 2 | 2 | 2 | 3.00 | 2.00 | 4.00 | 2.00 |
| N98 | 2 | #NULL! | #NULL! | #NULL! | #NULL! | #NULL! | 1 | 1 | 2 | 2 | 2 | 2 | 2 | 2 | 2 | 2 | 2 | 2 | 2 | 2 | 1 | 2 | 2 | 4.00 | 1.00 | 4.00 | 1.00 |
| N99 | 2 | #NULL! | #NULL! | #NULL! | #NULL! | #NULL! | 2 | 3 | 2 | 2 | 1 | 2 | 2 | 2 | 1 | 2 | 2 | 2 | 2 | 2 | 1 | 2 | 2 | 4.00 | 2.00 | 3.00 | 2.00 |
